# Supplementary material for: Hydrogen bonding to metals as a probe for an inverted ligand field
Source: Royal Society of Chemistry journal article supplement (doi:10.1039/d1dt00597a), 2021-01-01
Supplement: d1dt00597a2.pdf [file d1dt00597a2.pdf]

Electronic Supplementary Information  
for

**Hydrogen Bonding to Metals as a Probe for  
Inverted Ligand Field**

*Alberto Pérez-Bitrián, Miguel Baya, José M. Casas, Antonio Martín,  
and Babil Menjón\**

|                                                              |     |
|--------------------------------------------------------------|-----|
| ➤ 1. Experimental section and spectroscopic characterization | S1  |
| ➤ 2. Crystal data and structure refinement                   | S18 |
| ➤ 3. Computational details                                   | S24 |
| ➤ 4. Notes and references                                    | S27 |

## 1. Experimental Section and Spectroscopic Characterization

**General Procedures and Materials.** Unless otherwise indicated, the reactions and manipulations were carried out under purified argon by using Schlenk techniques. Previously degassed solvents were dried using an MBraun SPS-800 System ( $\text{CH}_2\text{Cl}_2$ ,  $\text{Et}_2\text{O}$  and *n*-hexane) or over activated 3 Å molecular sieves (MeCN,  $i$ PrOH). Compounds  $[\text{NBu}_4][(\text{CF}_3)_3\text{Pt}(\text{CO})]^{S1}$  and  $(\text{CF}_3)_3\text{Au}\cdot\text{OEt}_2^{S2}$  were prepared using published methods. All other reagents were purchased from standard commercial suppliers and used as received. Elemental analyses were carried out using a PerkinElmer 2400 CHNS/O Series II microanalyzer. IR spectra were recorded on neat solid samples using a PerkinElmer Spectrum FT-IR spectrometer ( $4000\text{--}250\text{ cm}^{-1}$ ) equipped with an ATR device. NMR spectra were recorded on Bruker ARX 300 or AV 400 spectrometers. Unless otherwise stated, the spectroscopic measurements were carried out at room temperature. Chemical shifts of the measured nuclei ( $\delta$  in ppm) are given with respect to the standard references in use:  $\text{SiMe}_4$  ( $^1\text{H}$  and  $^{13}\text{C}$ ) and  $\text{CFCl}_3$  ( $^{19}\text{F}$ ). Where applicable, resonances were assigned by means of  $^1\text{H}$ - $^1\text{H}$  COSY,  $^1\text{H}$ - $^{13}\text{C}$  HSQC and  $^1\text{H}$ - $^{13}\text{C}$  HMBC experiments. The numbering scheme for the assignments of the signals corresponding to the quinoline ligands is given in Chart S1. Chemically inequivalent  $\text{CF}_3$  groups are indicated as follows:  $\text{CF}_3\text{--M--L}$  refers to the  $\text{CF}_3$  group *trans* to the neutral L ligand, whereas  $\text{CF}_3\text{--M--CF}_3$  refers to the mutually *trans*-standing  $\text{CF}_3$  groups. Multiplicity is indicated as follows: s = singlet, d = doublet, q = quartet, spt = septet, m = multiplet,  $m_c$  = multiplet centered at. NMR parameters associated with the  $[\text{NBu}_4]^+$  cation in the Pt complexes are unexceptional and are therefore omitted.

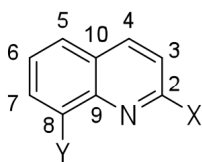

**Chart S1.** Numbering scheme for the ligands used in this work: 8-hydroxyquinoline (hq: X = H, Y = OH), 8-hydroxyquinaldine (hq': X = Me, Y = OH) and 8-methylquinoline (mq: X = H, Y = Me).

**Synthesis of [NBu<sub>4</sub>][(CF<sub>3</sub>)<sub>3</sub>Pt(NCMe)] (A) in solution:** Me<sub>3</sub>NO (12 mg, 149 μmol) was added to a solution of [NBu<sub>4</sub>][(CF<sub>3</sub>)<sub>3</sub>Pt(CO)] (100 mg, 149 μmol) in 5 mL MeCN. After 2 h of stirring, the solution was concentrated to dryness. Addition of 5 mL CH<sub>2</sub>Cl<sub>2</sub> gave a solution of complex **A**, which is suitable for most synthetic purposes. Full conversion was checked by <sup>19</sup>F NMR. <sup>19</sup>F NMR (376.308 MHz, CD<sub>3</sub>CN, 298 K; Figure S1): δ<sub>F</sub> / ppm = -22.17 [spt, 3F, <sup>2</sup>J(<sup>195</sup>Pt,F) = 940 Hz, <sup>4</sup>J(F,F) = 3.4 Hz; CF<sub>3</sub>-Pt-L], -28.19 [q, 6F, <sup>2</sup>J(<sup>195</sup>Pt, F) = 516 Hz; CF<sub>3</sub>-Pt-CF<sub>3</sub>].

**Synthesis of [NBu<sub>4</sub>][(CF<sub>3</sub>)<sub>3</sub>Pt(hq)] (1):** The equimolar amount of hq (22 mg, 149 μmol) was added to a freshly-prepared solution of the precursor species **A** (149 μmol) in CH<sub>2</sub>Cl<sub>2</sub> (5 mL). After 20 min of stirring, the solution was concentrated to dryness. By treating the resulting residue with *i*PrOH (2 mL), a yellow solid was formed, which was filtered, washed with *n*-hexane (3 mL), vacuum dried and identified as compound **1** (60 mg, 76 μmol, 51% yield). **IR** (Figure S16):  $\tilde{\nu}$  / cm<sup>-1</sup> = 2965 (m), 2938 (m), 2877 (w), 1617 (w), 1591 (w), 1580 (w), 1508 (m), 1499 (w), 1483 (m), 1463 (m), 1404 (w), 1387 (w), 1368 (w), 1337 (w), 1322 (w), 1286 (w), 1263 (m), 1215 (w), 1192 (w), 1173 (w), 1152 (s), 1135 (m), 1087 (vs), 1078 (vs), 1031 (s), 984 (vs), 899 (m), 880 (m), 831 (s), 800 (m), 783 (m), 768 (m), 752 (m), 740 (m), 730 (m), 692 (w), 632 (w), 590 (w), 542 (m), 522 (m), 510 (w), 477 (m), 454 (w), 408 (w), 375 (w), 348 (w), 321 (m), 314 (m), 287 (w), 278 (m), 270 (m). <sup>1</sup>H NMR (300.130 MHz, CD<sub>2</sub>Cl<sub>2</sub>, 253 K; Figure S2): δ<sub>H</sub> / ppm = 10.82 [s, 1H, <sup>1</sup>J(<sup>195</sup>Pt,H) = 82.7 Hz; OH], 9.29 [dd, 1H, <sup>3</sup>J(<sup>195</sup>Pt,H) ≈ 25 Hz, <sup>3</sup>J(H2,H3) = 5.0 Hz, <sup>4</sup>J(H2,H4) = 1.6 Hz; H2], 8.30 [dd, 1H, <sup>3</sup>J(H4, H3) = 8.4 Hz; H4], 7.53 (m<sub>c</sub>, 1H; H6), 7.47–7.37 (m, 2H; H3 + H7), 7.28 [dd, 1H, <sup>3</sup>J(H5,H6) = 7.7 Hz, <sup>4</sup>J(H5, H7) = 1.5 Hz; H5]. <sup>13</sup>C{<sup>1</sup>H} NMR (75.432 MHz, CD<sub>2</sub>Cl<sub>2</sub>, 253 K): δ<sub>C</sub> / ppm = 151.6 (C2), 139.6 (C4), 128.5 (C6), 121.1/119.9 (C3/C7), 116.4 (C5).<sup>S3</sup> <sup>19</sup>F NMR (282.231 MHz, CD<sub>2</sub>Cl<sub>2</sub>, 253 K; Figure S3): δ<sub>F</sub> / ppm = -21.70 [spt, 3F, <sup>2</sup>J(<sup>195</sup>Pt,F) = 858 Hz, <sup>4</sup>J(F,F) = 3.3 Hz; CF<sub>3</sub>-Pt-L], -30.63 [q, 6F, <sup>2</sup>J(<sup>195</sup>Pt,F) = 509 Hz; CF<sub>3</sub>-Pt-CF<sub>3</sub>]. **Elemental analysis** calcd (%) for C<sub>28</sub>H<sub>43</sub>F<sub>9</sub>N<sub>2</sub>OPt: C 42.6, H 5.5, N 3.55; found: C 42.2, H 5.1, N 3.3.

**Synthesis of [NBu<sub>4</sub>][(CF<sub>3</sub>)<sub>3</sub>Pt(hq')] (**2**):** By using the procedure just described for the synthesis of **1**, compound **2** was prepared starting from a CH<sub>2</sub>Cl<sub>2</sub> solution of the precursor species **A** (149 μmol) and hq' (24 mg, 149 μmol). Complex **2** was obtained as a white solid (65 mg, 81 μmol, 54% yield). **IR** (Figure S17):  $\tilde{\nu}$  / cm<sup>-1</sup> = 2963 (m), 2938 (m), 2876 (w), 1606 (w), 1569 (w), 1518 (w, sh), 1484 (m), 1457 (m), 1441 (m), 1425 (w), 1380 (w), 1358 (w), 1328 (w), 1319 (w), 1286 (w), 1260 (m), 1212 (w), 1196 (w), 1172 (w), 1151 (s), 1131 (m), 1107 (m), 1086 (vs), 1078 (vs), 1029 (s), 981 (vs), 959 (vs), 876 (m), 843 (s), 796 (w), 763 (m), 747 (m), 711 (w), 691 (w), 665 (w), 625 (w), 554 (m), 519 (w), 477 (w), 442 (w), 322 (m), 311 (m), 301 (m), 284 (w), 270 (m). **<sup>1</sup>H NMR** (300.130 MHz, CD<sub>2</sub>Cl<sub>2</sub>, 253 K; Figure S4):  $\delta_{\text{H}}$  / ppm = 11.10 [s, 1H,  $^1J(^{195}\text{Pt},\text{H}) = 100$  Hz; OH], 8.16 [d, 1H,  $^3J(\text{H}_4,\text{H}_3) = 8.4$  Hz; H4], 7.45 (m<sub>c</sub>, 1H; H6), 7.38–7.28 (m, 2H; H3 + H5), 7.24 (m<sub>c</sub>, 1H; H7), 3.35 (s, 3H; CH<sub>3</sub>). **<sup>13</sup>C{<sup>1</sup>H} NMR** (75.432 MHz, CD<sub>2</sub>Cl<sub>2</sub>, 253 K):  $\delta_{\text{C}}$  / ppm = 162.3 (C2), 151.6 (C8), 139.8 (C4), 135.7 (C9), 129.8 (C10), 127.4 (C6), 123.8 (C3), 120.0 (C5), 117.3 (C7), 28.5 (CH<sub>3</sub>). **<sup>19</sup>F NMR** (282.231 MHz, CD<sub>2</sub>Cl<sub>2</sub>, 253 K; Figure S5):  $\delta_{\text{F}}$  / ppm = -21.83 [spt, 3F,  $^2J(^{195}\text{Pt},\text{F}) = 867$  Hz,  $^4J(\text{F},\text{F}) = 3.3$  Hz; CF<sub>3</sub>-Pt-L], -30.09 [q, 6F,  $^2J(^{195}\text{Pt},\text{F}) = 501$  Hz; CF<sub>3</sub>-Pt-CF<sub>3</sub>]. **Elemental analysis** calcd (%) for C<sub>29</sub>H<sub>45</sub>F<sub>9</sub>N<sub>2</sub>OPt: C 43.3, H 5.6, N 3.5; found: C 43.0, H 5.5, N 3.5. **Single crystals** of **2** suitable for X-ray diffraction were obtained by slow diffusion of a layer of *n*-hexane (5 mL) into a solution of **2** (7 mg) in CH<sub>2</sub>Cl<sub>2</sub> (2 mL) at -30 °C.

**Synthesis of (CF<sub>3</sub>)<sub>3</sub>Au(hq) (**3**):** The equimolar amount of hq (13 mg, 92 μmol) was added to a freshly-prepared solution of (CF<sub>3</sub>)<sub>3</sub>Au-OEt<sub>2</sub> (92 μmol) in Et<sub>2</sub>O/*n*-hexane (5/15 mL). The resulting mixture was stirred for 20 min. Removal of the solvent by vacuum evaporation afforded a white solid, which was suspended in *n*-hexane (2 mL), filtered, vacuum dried, and identified as compound **3** (36 mg, 66 μmol, 71% yield). **IR** (Figure S18):  $\tilde{\nu}$  / cm<sup>-1</sup> = 3581 (m,  $\nu_{\text{OH}}$ ), 1623 (w), 1593 (w), 1527 (m), 1477 (w), 1440 (w), 1420 (w), 1378 (m), 1324 (m), 1282 (w), 1262 (m), 1235 (w), 1205 (w), 1169 (s), 1144 (w), 1080 (vs), 1052 (vs), 972 (s), 954 (m), 914 (m), 886 (w), 824 (s), 802 (w), 777 (m), 756 (s), 740 (m), 730 (m), 711 (m), 593 (w), 580 (w), 538 (w), 522 (w), 499 (w), 478 (m), 444 (w), 338 (s), 329 (s), 314 (s), 303 (vs), 265 (s). **<sup>1</sup>H NMR** (400.130

MHz, CD<sub>2</sub>Cl<sub>2</sub>, 298 K; Figure S6):  $\delta_{\text{H}}$  / ppm = 8.97 [dd, 1H,  $^3J(\text{H2},\text{H3}) = 5.2$  Hz,  $^4J(\text{H2},\text{H4}) = 1.4$  Hz; H2), 8.57 [dd, 1H,  $^3J(\text{H4},\text{H3}) = 8.4$  Hz; H4], 7.74 (dd, 1H; H3), 7.69–7.62 (m, 2H; H5 + H6), 7.40 (m<sub>c</sub>, 1H; H7), 7.03 (br s, 1H; OH). **<sup>13</sup>C{<sup>1</sup>H} NMR** (100.577 MHz, CD<sub>2</sub>Cl<sub>2</sub>, 298 K):  $\delta_{\text{C}}$  / ppm = 151.1 (C2), 148.0 (C8), 142.7 (C4), 135.5 (C9), 132.3 (C10), 129.7/122.9 (C5/C6), 122.7 (C3), 117.6 (C7). **<sup>19</sup>F NMR** (376.308 MHz, CD<sub>2</sub>Cl<sub>2</sub>, 298 K; Figure S7):  $\delta_{\text{F}}$  / ppm = -27.96 [spt, 3F,  $^4J(\text{F},\text{F}) = 6.2$  Hz; CF<sub>3</sub>–Au–L], -38.20 (q, 6F; CF<sub>3</sub>–Au–CF<sub>3</sub>). **Elemental analysis** calcd (%) for C<sub>12</sub>H<sub>7</sub>AuF<sub>9</sub>NO: C 26.25, H 1.3, N 2.55; found: C 26.3, H 1.3, N 2.6.

**Single crystals** of **3**·OEt<sub>2</sub> suitable for X-ray diffraction were obtained after cooling a solution of **3** (7 mg) in Et<sub>2</sub>O/*n*-hexane (2/4 mL) at -30 °C for several days.

**Single crystals** of **3**·OH<sub>2</sub> suitable for X-ray diffraction were obtained by slow diffusion of a layer of *n*-hexane (5 mL) into a solution of **3** (7 mg) in wet CH<sub>2</sub>Cl<sub>2</sub> (2 mL) at -30 °C. Preferential crystallization of the hydrate occurs. Many other attempts using thoroughly dried solvents produced just poor-quality crystals of no use for XRD purposes.

**Synthesis of (CF<sub>3</sub>)<sub>3</sub>Au(hq') (4):** By using the procedure just described for the synthesis of **3**, compound **4** was prepared starting from a Et<sub>2</sub>O/*n*-hexane solution of (CF<sub>3</sub>)<sub>3</sub>Au·OEt<sub>2</sub> (92 μmol) and hq' (15 mg, 92 μmol). Complex **4** was isolated as a white solid (38 mg, 67 μmol, 73% yield). **IR** (Figure S19):  $\tilde{\nu}$  / cm<sup>-1</sup> = 3575 (m,  $\nu_{\text{OH}}$ ), 1623 (w), 1606 (w), 1581 (m), 1524 (m), 1481 (w), 1440 (m), 1388 (w), 1374 (w), 1353 (m), 1334 (w), 1327 (w), 1298 (w), 1281 (w), 1266 (w), 1222 (m), 1202 (w), 1168 (s), 1150 (w), 1082 (vs), 1058 (vs), 986 (s), 966 (s), 927 (m), 881 (m), 835 (s), 754 (s), 729 (m), 711 (m), 657 (m), 580 (w), 570 (w), 540 (w), 529 (w), 511 (m), 452 (w), 441 (w), 416 (w), 325 (s), 315 (s), 297 (vs), 260 (s). **<sup>1</sup>H NMR** (400.130 MHz, CD<sub>2</sub>Cl<sub>2</sub>, 298 K; Figure S9):  $\delta_{\text{H}}$  / ppm = 8.42 [d, 1H,  $^3J(\text{H4},\text{H3}) = 8.5$  Hz; H4], 7.64–7.55 (m, 3H; H3 + H5 + H6), 7.36 [dd, 1H,  $^3J(\text{H7},\text{H6}) = 7.0$  Hz,  $^4J(\text{H7},\text{H5}) = 2.0$  Hz; H7], 6.66 (br s, 1H; OH), 3.22 (s, 3H; CH<sub>3</sub>). **<sup>13</sup>C{<sup>1</sup>H} NMR** (100.577 MHz, CD<sub>2</sub>Cl<sub>2</sub>, 298 K):  $\delta_{\text{C}}$  / ppm = 161.3 (C2), 147.6 (C8), 142.3 (C4), 135.2 (C9), 130.4 (C10), 128.6 (C6), 125.4 (C3), 122.8 (C5), 117.9 (C7), 27.6 (CH<sub>3</sub>). **<sup>19</sup>F NMR** (376.308 MHz, CD<sub>2</sub>Cl<sub>2</sub>, 298 K; Figure S10):

$\delta_F$  / ppm =  $-28.50$  [spt, 3F,  $^4J(F,F) = 6.0$  Hz,  $CF_3-Au-L$ ],  $-37.53$  (q, 6F;  $CF_3-Au-CF_3$ ).

**Elemental analysis** calcd (%) for  $C_{13}H_9AuF_9NO$ : C 27.7, H 1.6, N 2.5; found: C 27.85, H 1.7, N 2.5.

**Synthesis of  $[NBu_4][(CF_3)_3Pt(mq)]$  (5):**  $Me_3NO$  (12 mg, 149  $\mu$ mol) was added to a solution of  $[NBu_4][(CF_3)_3Pt(CO)]$  (100 mg, 149  $\mu$ mol) and  $mq$  (63  $\mu$ L, 446  $\mu$ mol) in 5 mL  $CH_2Cl_2$ . After 2 h of stirring, the solution was concentrated to dryness. By treating the resulting residue with *i*PrOH (2 mL), a yellow solid was formed, which was filtered, washed with *n*-hexane (3 mL), vacuum dried and identified as compound **5** (64 mg, 81  $\mu$ mol, 55% yield). **IR** (Figure S20):  $\tilde{\nu}$  /  $cm^{-1}$  = 2967 (m), 2937 (w), 2878 (w), 2117 (w), 1599 (w), 1509 (m), 1484 (m), 1465 (m), 1448 (w), 1421 (w), 1383 (w), 1356 (w), 1304 (w), 1198 (w), 1147 (s), 1130 (w), 1097 (m), 1069 (vs), 1014 (s), 970 (vs), 957 (vs), 938 (s), 880 (m), 828 (s), 804 (m), 783 (s), 771 (m), 740 (m), 731 (m), 722 (m), 688 (w), 578 (w), 550 (w), 525 (w), 490 (w), 477 (w), 464 (w), 440 (w), 314 (s), 298 (m), 283 (w), 269 (m).  **$^1H$  NMR** (400.130 MHz,  $CD_2Cl_2$ , 273 K; Figure S12):  $\delta_H$  / ppm = 9.67 [dd, sh, 1H,  $^3J(H_2,H_3) = 5.1$  Hz,  $^4J(H_2,H_4) = 1.6$  Hz; H2], 8.28 [dd, 1H,  $^3J(H_4,H_3) = 8.2$  Hz; H4], 7.74 [br d, 1H,  $^3J(H_5,H_6) = 8.0$  Hz; H5], 7.66 [br d, 1H,  $^3J(H_7,H_6) = 7.0$  Hz; H7], 7.49 (m<sub>c</sub>, 1H; H6), 7.40 (dd, 1H; H3), 3.83 (s, 3H;  $CH_3$ ).  **$^{13}C\{^1H\}$  NMR** (100.577 MHz,  $CD_2Cl_2$ , 273 K):  $\delta_C$  / ppm = 154.5 (C2), 145.0 (C9), 139.5 (C4), 134.2 (C7), 127.8 (C5), 127.1 (C6), 120.5 (C3), 22.7 ( $CH_3$ ).<sup>S4</sup>  **$^{19}F$  NMR** (282.231 MHz,  $CD_2Cl_2$ , 273 K; Figure S13):  $\delta_F$  / ppm =  $-18.66$  [spt, 3F,  $^2J(^{195}Pt,F) = 908$  Hz,  $^4J(F,F) = 3.2$  Hz;  $CF_3-Pt-L$ ],  $-28.92$  [q, 6F,  $^2J(^{195}Pt,F) = 516$  Hz;  $CF_3-Pt-CF_3$ ]. **Elemental analysis** calcd (%) for  $C_{29}H_{45}F_9N_2Pt$ : C 44.2, H 5.8, N 3.6; found: C 43.8, H 5.4, N 3.3. **Single crystals** of **5** suitable for X-ray diffraction were obtained by slow diffusion of a layer of *n*-hexane (5 mL) into a solution of **5** (7 mg) in  $CH_2Cl_2$  (2 mL) at  $-30$  °C.

**Synthesis of  $(CF_3)_3Au(mq)$  (6):** By using the procedure just described for the synthesis of **3**, compound **6** was prepared starting from an  $Et_2O/n$ -hexane solution of compound  $(CF_3)_3Au \cdot OEt_2$  (92  $\mu$ mol) and  $mq$  (13  $\mu$ L, 92  $\mu$ mol). Complex **6** was obtained as a white solid (34 mg, 62  $\mu$ mol, 68% yield). **IR** (Figure S21):  $\tilde{\nu}$  /  $cm^{-1}$  =

1612 (w), 1598 (w), 1516 (m), 1474 (w), 1460 (w), 1452 (w), 1396 (w), 1378 (w), 1361 (w), 1310 (w), 1166 (m), 1098 (vs), 1085 (vs), 1064 (vs), 1042 (vs), 1025 (vs), 991 (s), 981 (s), 957 (m), 914 (m), 891 (m), 825 (s), 804 (w), 773 (s), 763 (m), 732 (m), 725 (m), 711 (m), 626 (w), 579 (w), 545 (m), 532 (w), 525 (m), 489 (m), 468 (m), 462 (m), 433 (m), 311 (m), 303 (s). **<sup>1</sup>H NMR** (400.130 MHz, CD<sub>2</sub>Cl<sub>2</sub>, 298 K; Figure S14): δ<sub>H</sub> / ppm = 9.06 [dd, 1H, <sup>3</sup>J(H2,H3) = 5.3 Hz, <sup>4</sup>J(H2,H4) = 1.5 Hz; H2], 8.62 [dd, 1H, <sup>3</sup>J(H4,H3) = 8.2 Hz; H4], 7.95 [br d, 1H, <sup>3</sup>J(H5,H6) = 8.1 Hz; H5], 7.88 (m<sub>c</sub>, 1H; H7), 7.75 (dd, 1H; H3), 7.70 (m<sub>c</sub>, 1H; H6), 3.44 (s, 3H; CH<sub>3</sub>). **<sup>13</sup>C{<sup>1</sup>H} NMR** (100.577 MHz, CD<sub>2</sub>Cl<sub>2</sub>, 298 K): δ<sub>C</sub> / ppm = 151.8 (C2), 144.7 (C9), 144.2 (C4), 137.3 (C7), 132.2 (C10), 131.9 (C8), 129.4/129.3 (C5/C6), 121.9 (C3), 20.5 (CH<sub>3</sub>). **<sup>19</sup>F NMR** (376.308 MHz, CD<sub>2</sub>Cl<sub>2</sub>, 298 K; Figure S15): δ<sub>F</sub> / ppm = -27.85 [spt, 3F, <sup>4</sup>J(F,F) = 6.4 Hz; CF<sub>3</sub>-Au-L], -37.58 (q, 6F; CF<sub>3</sub>-Au-CF<sub>3</sub>). **Elemental analysis** calcd (%) for C<sub>13</sub>H<sub>9</sub>AuF<sub>9</sub>N: C 28.5, H 1.7, N 2.6; found: C 28.85, H 1.7, N 2.7. **Single crystals** of **6** suitable for X-ray diffraction were obtained by slow diffusion of a layer of *n*-hexane (5 mL) into a solution of **6** (7 mg) in CH<sub>2</sub>Cl<sub>2</sub> (2 mL) at 4 °C.

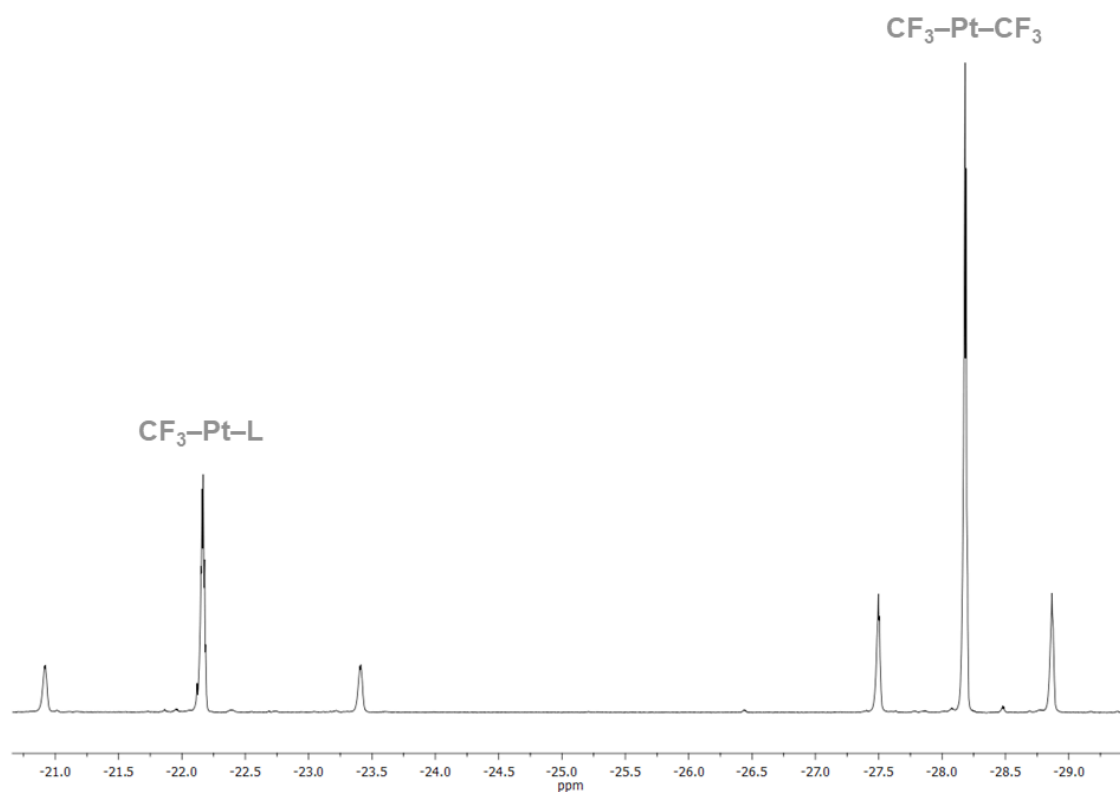

**Figure S1.** <sup>19</sup>F NMR spectrum (376.308 MHz) of [NBu<sub>4</sub>][(CF<sub>3</sub>)<sub>3</sub>Pt(NCMe)] (**A**) in CD<sub>3</sub>CN solution at 298 K.

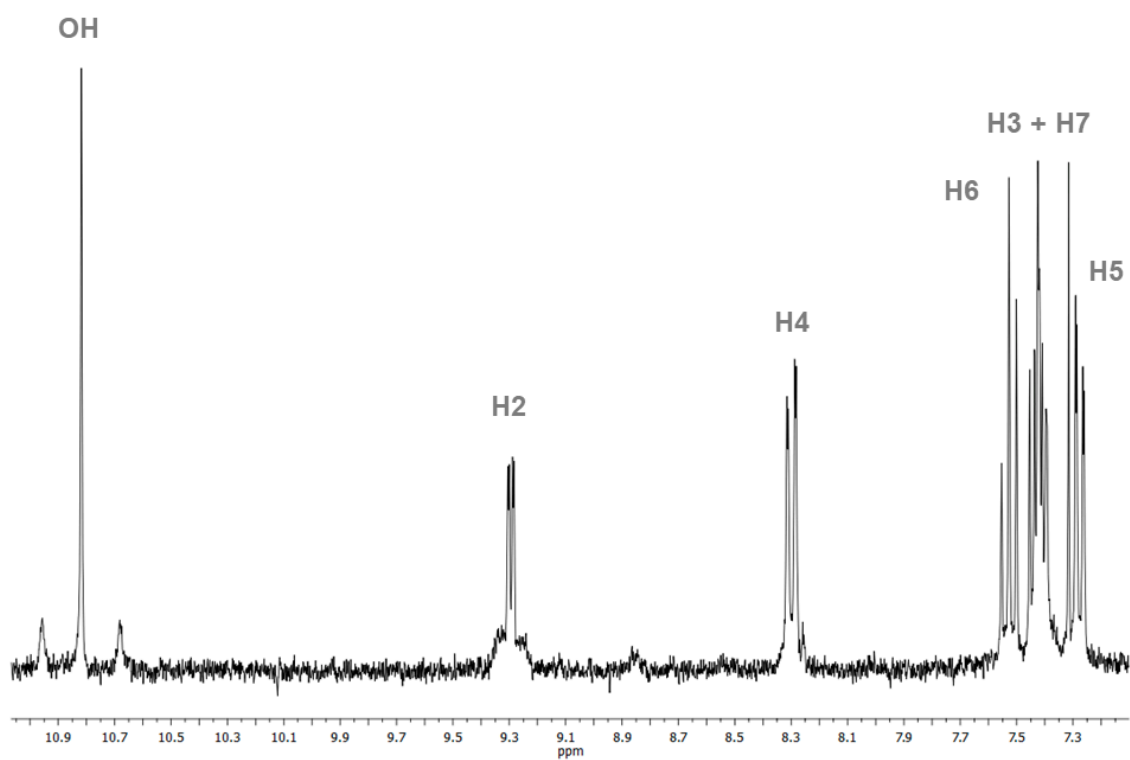

**Figure S2.**  $^1\text{H}$  NMR spectrum (300.130 MHz) of  $[\text{NBu}_4][(\text{CF}_3)_3\text{Pt}(\text{hq})]$  (**1**) in  $\text{CD}_2\text{Cl}_2$  solution at 253 K.

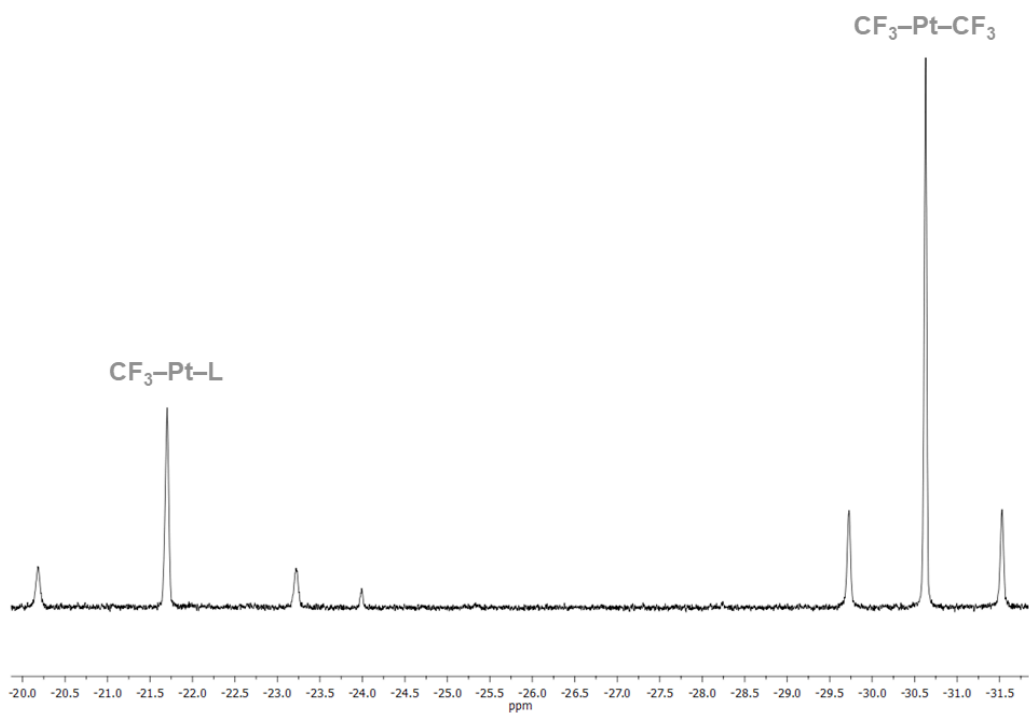

**Figure S3.**  $^{19}\text{F}$  NMR spectrum (282.231 MHz) of  $[\text{NBu}_4][(\text{CF}_3)_3\text{Pt}(\text{hq})]$  (**1**) in  $\text{CD}_2\text{Cl}_2$  solution at 253 K.



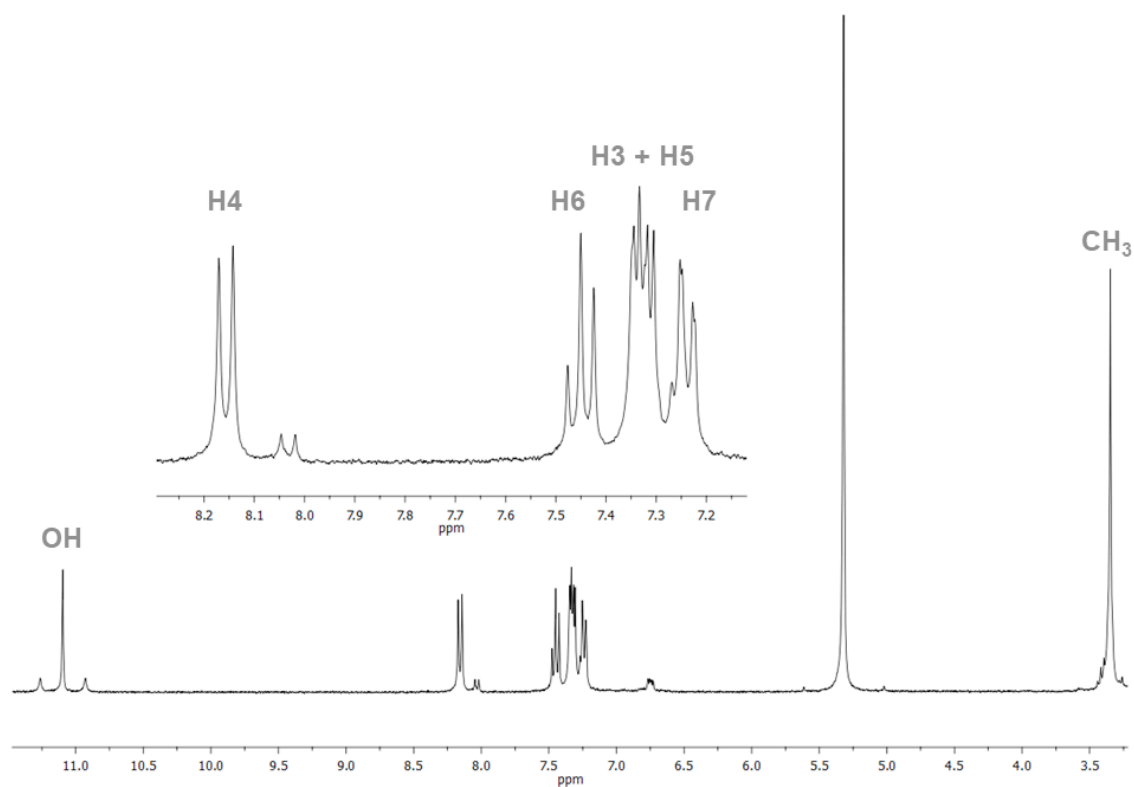

**Figure S4.**  $^1\text{H}$  NMR spectrum (300.130 MHz) of  $[\text{NBu}_4][(\text{CF}_3)_3\text{Pt}(\text{hq}')]$  (2) in  $\text{CD}_2\text{Cl}_2$  solution at 253 K (*cf.* Figure 1b).

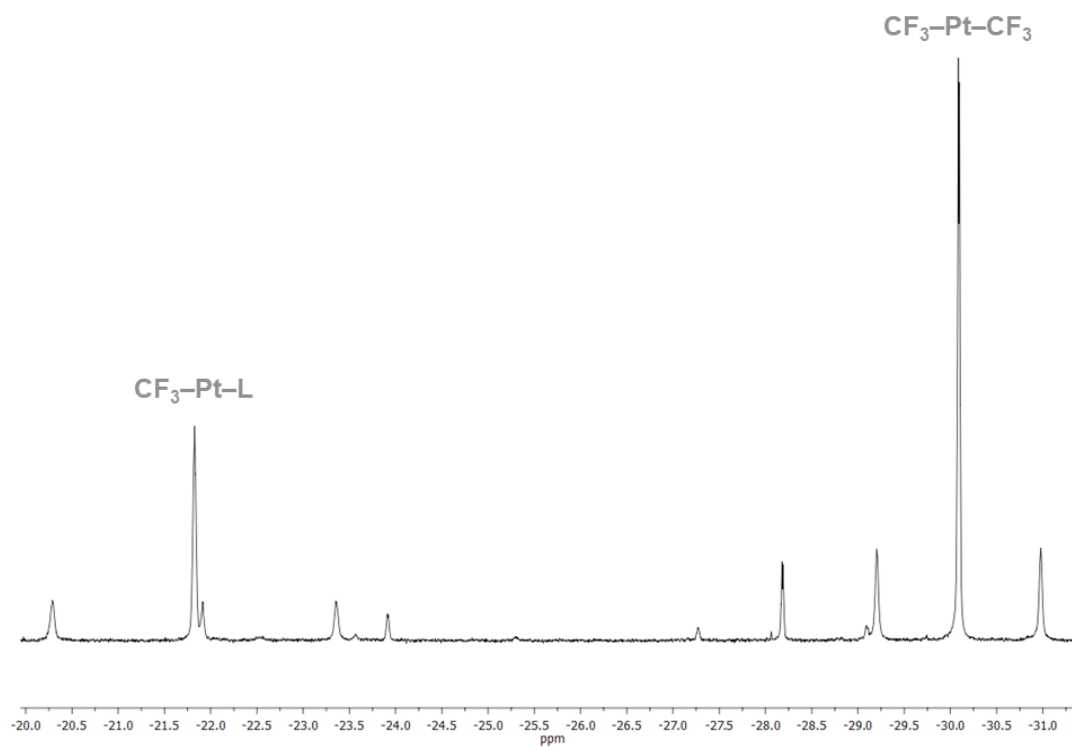

**Figure S5.**  $^{19}\text{F}$  NMR spectrum (282.231 MHz) of  $[\text{NBu}_4][(\text{CF}_3)_3\text{Pt}(\text{hq}')]$  (2) in  $\text{CD}_2\text{Cl}_2$  solution at 253 K.

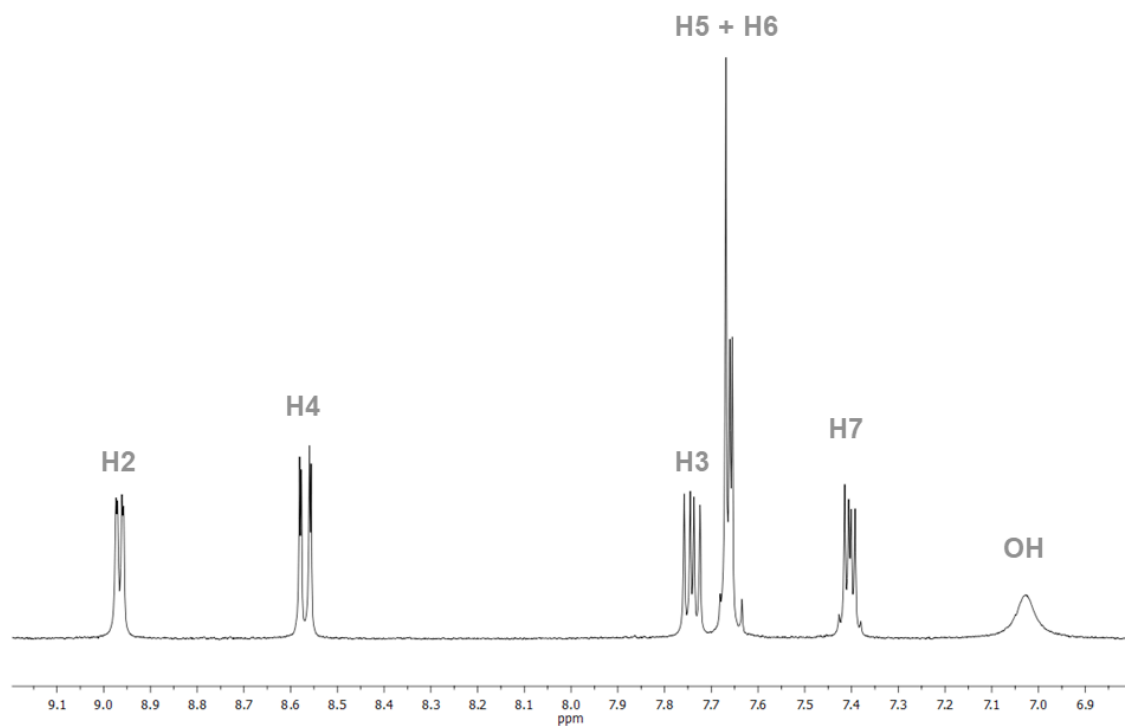

**Figure S6.**  $^1\text{H}$  NMR spectrum (400.130 MHz) of  $(\text{CF}_3)_3\text{Au}(\text{hq})$  (**3**) in  $\text{CD}_2\text{Cl}_2$  solution at 298 K.

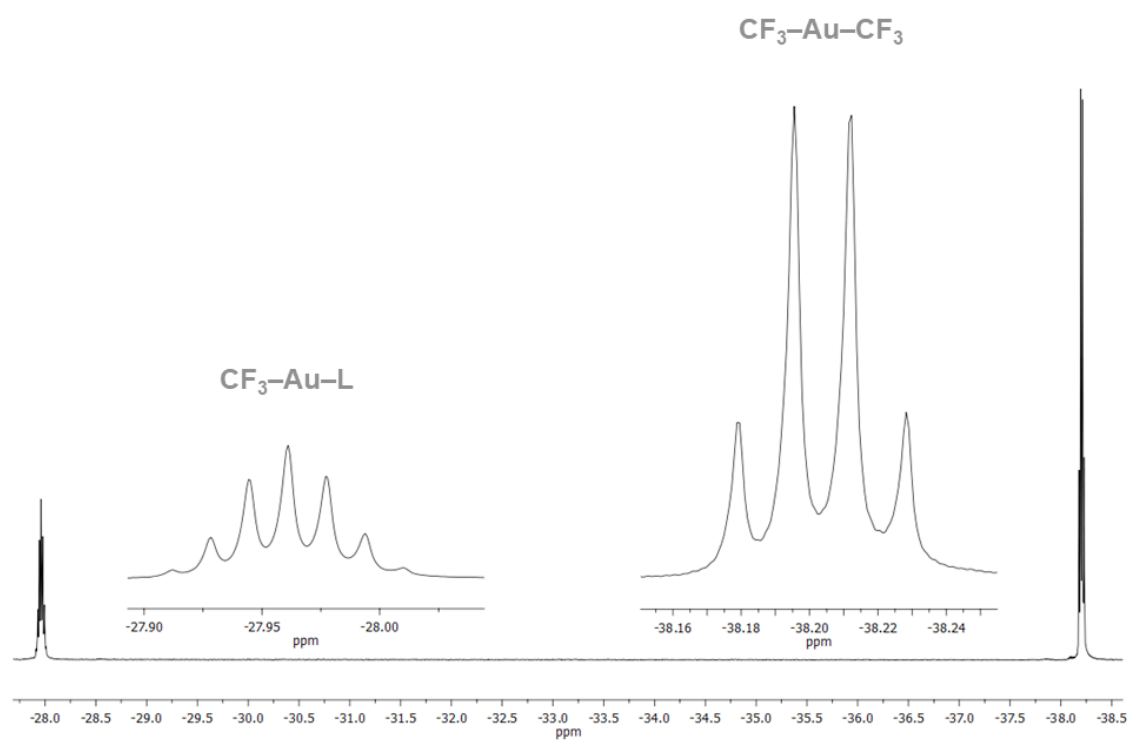

**Figure S7.**  $^{19}\text{F}$  NMR spectrum (376.308 MHz) of  $(\text{CF}_3)_3\text{Au}(\text{hq})$  (**3**) in  $\text{CD}_2\text{Cl}_2$  solution at 298 K.

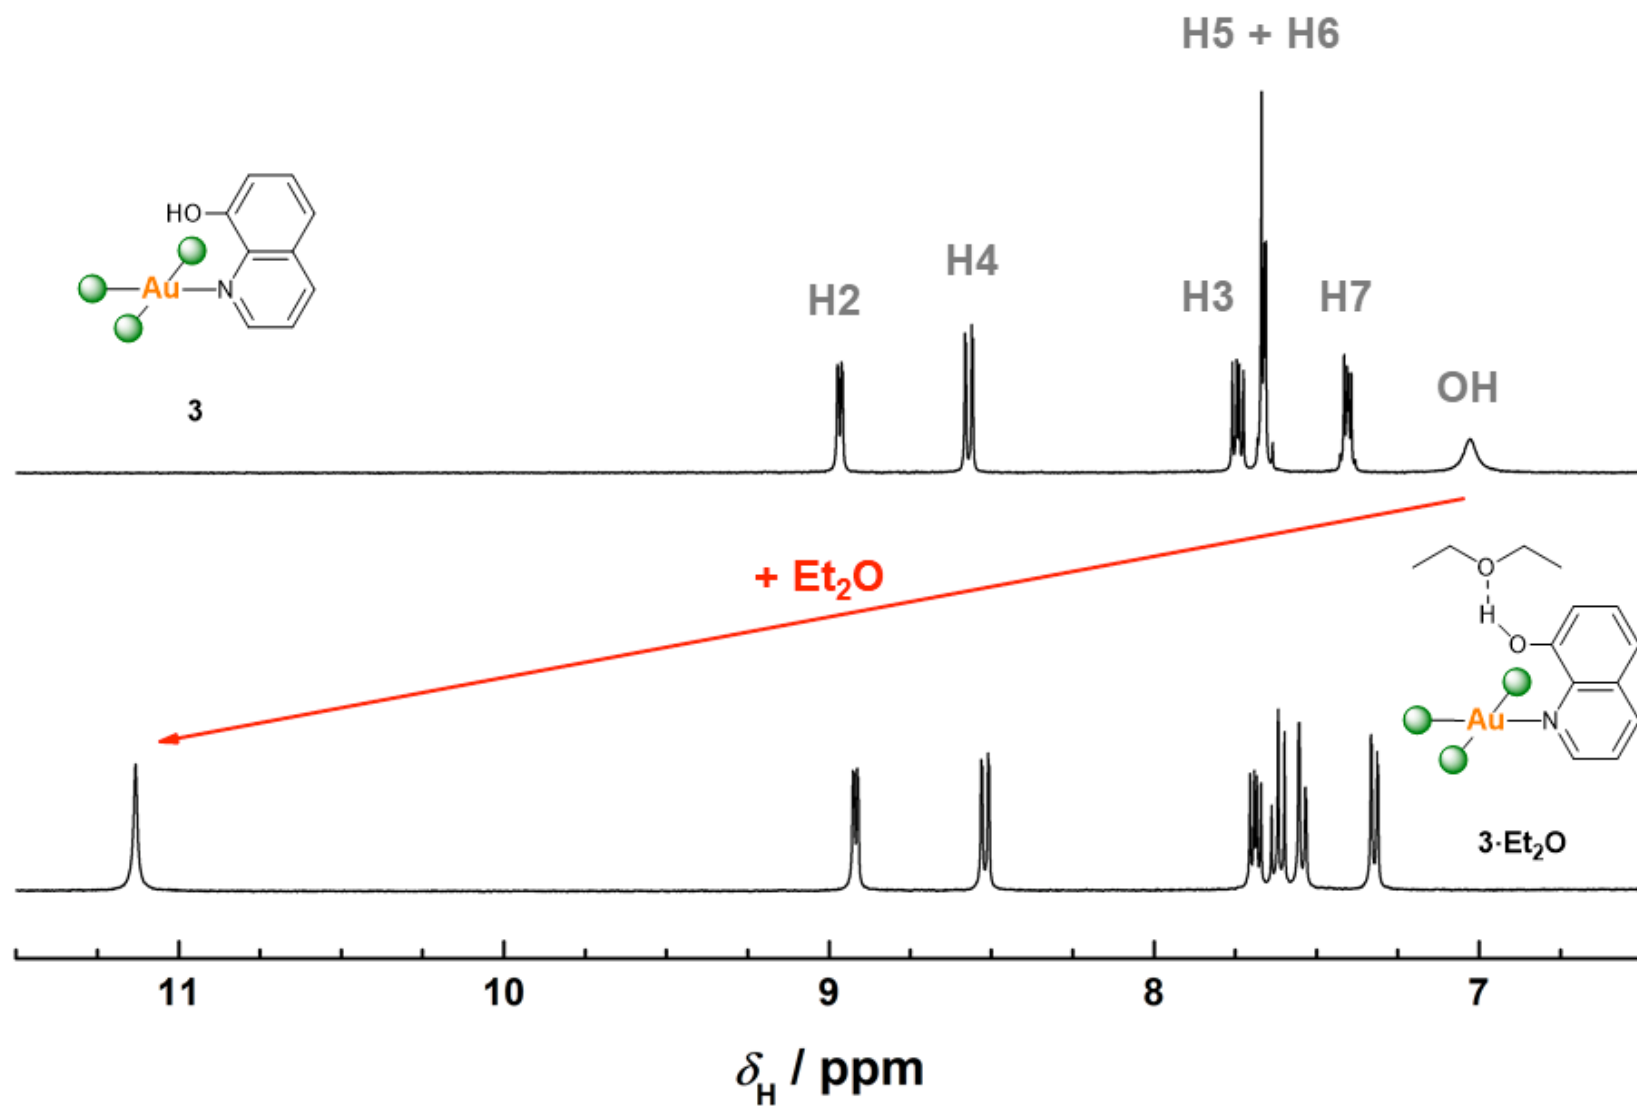

**Figure S8.** Low-field region of the  $^1\text{H}$  NMR spectrum (400.130 MHz) of  $(\text{CF}_3)_3\text{Au}(\text{hq})$  (**3**) in  $\text{CD}_2\text{Cl}_2$  solution at room temperature (above) and upon addition of  $\text{Et}_2\text{O}$  to the sample (below). The dramatic downfield shift observed in the resonance of the OH unit is in line with the formation of the **3·OEt<sub>2</sub>** adduct (see Figure 2a).

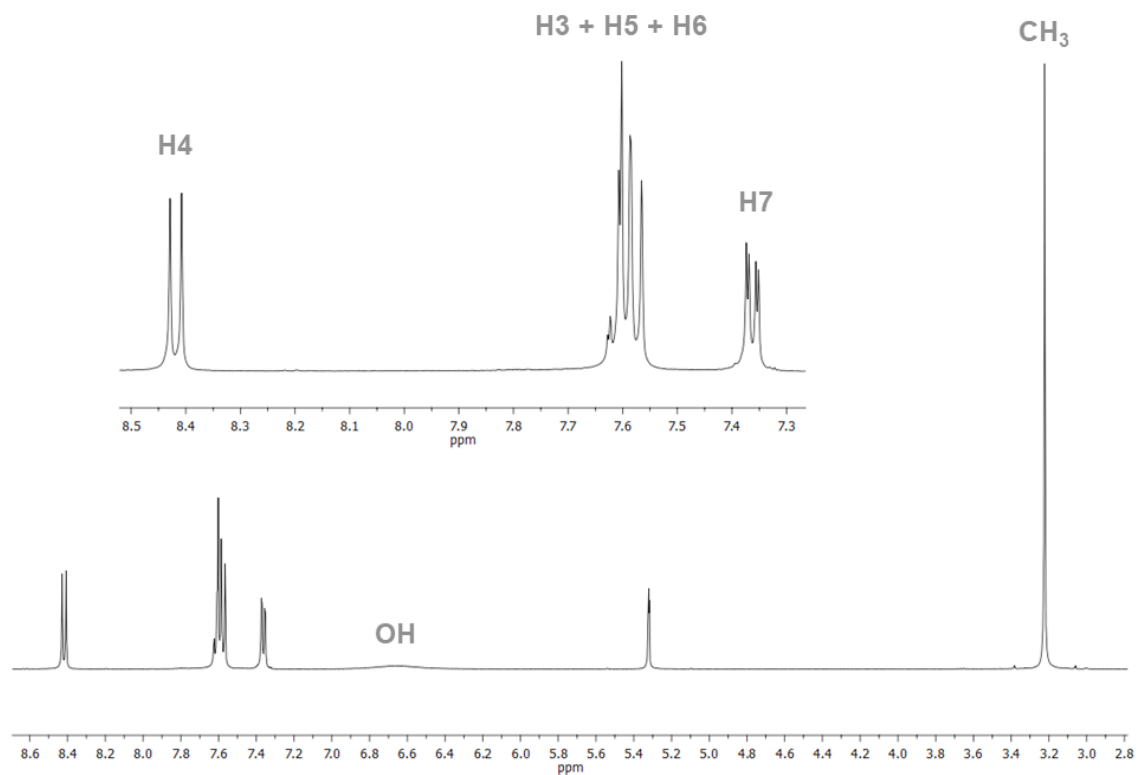

**Figure S9.**  $^1\text{H}$  NMR spectrum (400.130 MHz) of  $(\text{CF}_3)_3\text{Au}(\text{hq}') (4)$  in  $\text{CD}_2\text{Cl}_2$  solution at 298 K.

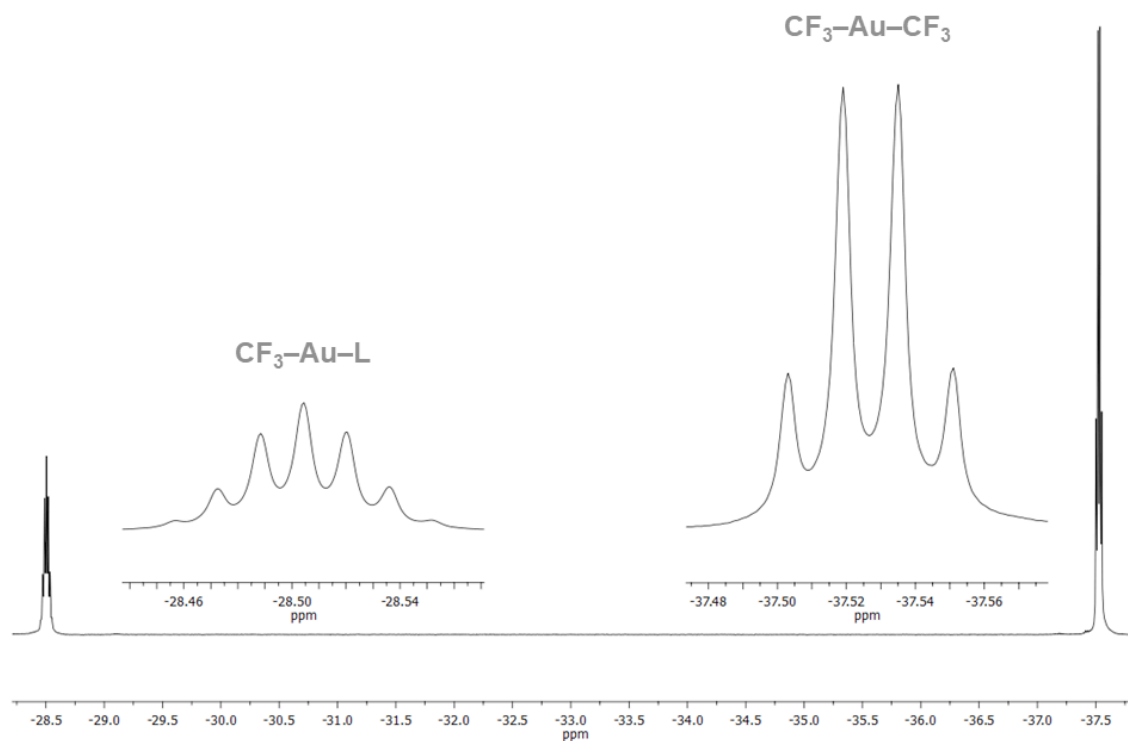

**Figure S10.**  $^{19}\text{F}$  NMR spectrum (376.308 MHz) of  $(\text{CF}_3)_3\text{Au}(\text{hq}') (4)$  in  $\text{CD}_2\text{Cl}_2$  solution at 298 K.

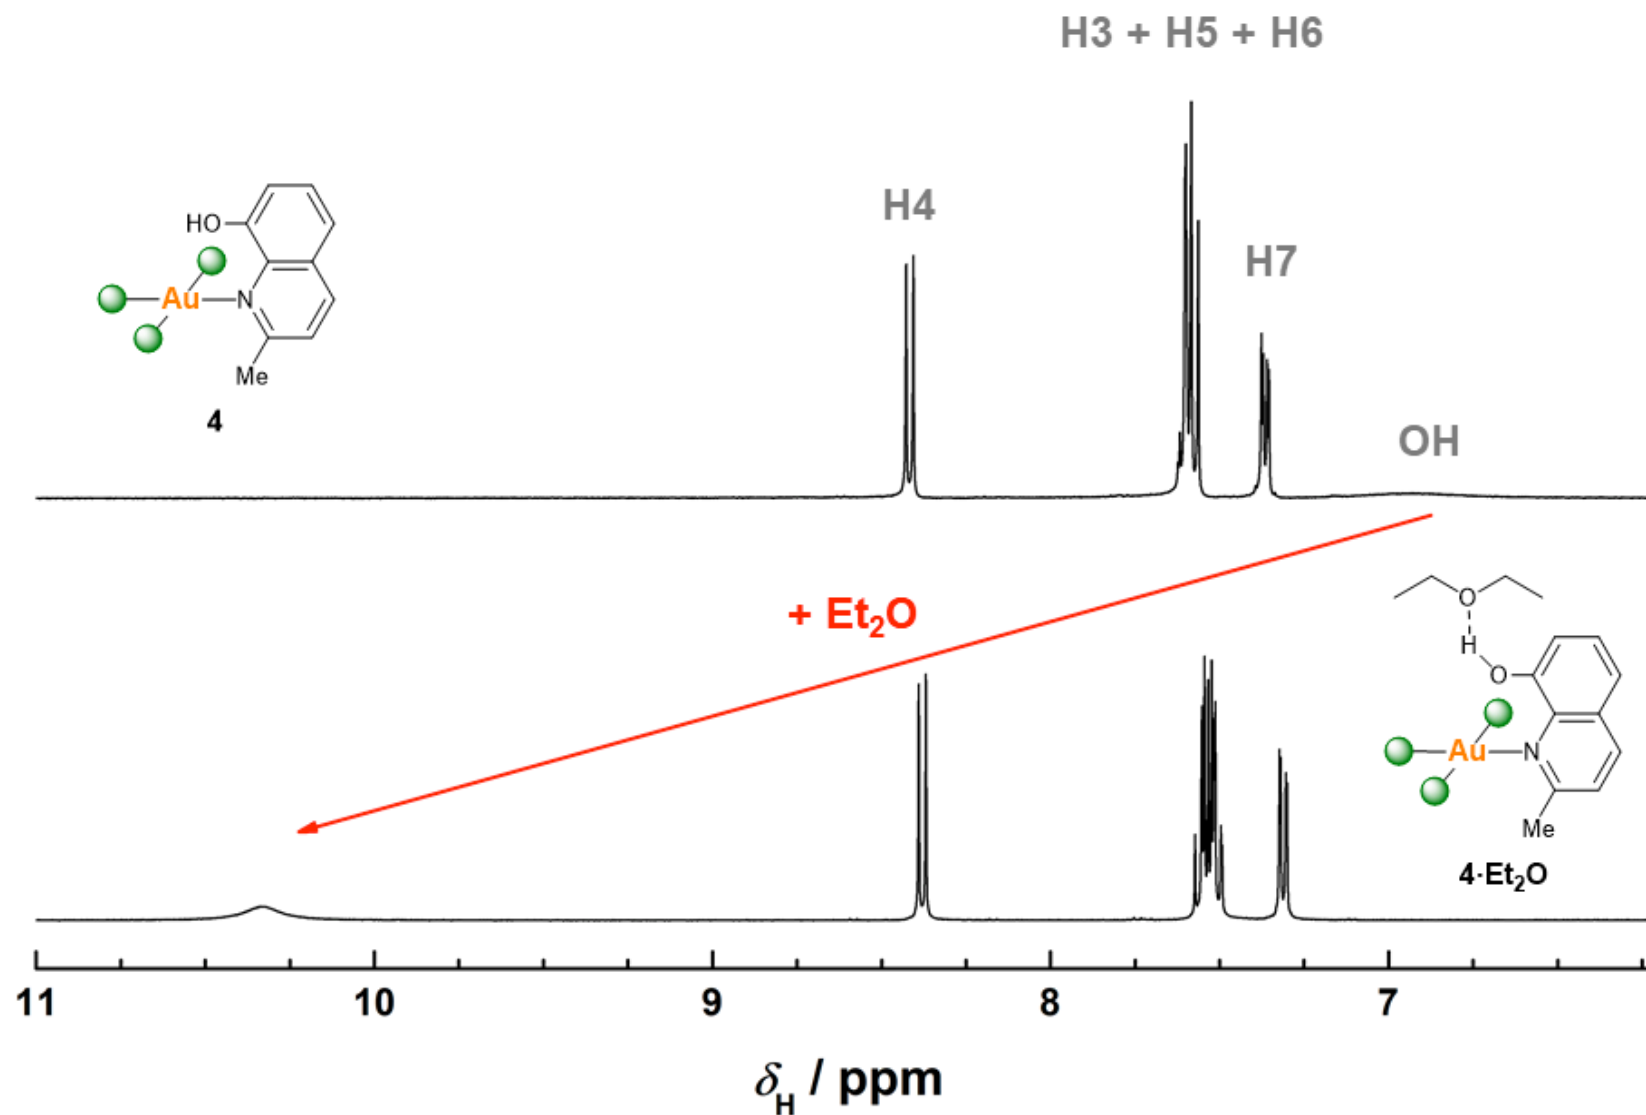

**Figure S11.** Low-field region of the  $^1\text{H}$  NMR spectrum (400.130 MHz) of  $(\text{CF}_3)_3\text{Au}(\text{hq}')$  (**4**) in  $\text{CD}_2\text{Cl}_2$  solution at room temperature (above) and upon addition of  $\text{Et}_2\text{O}$  to the sample (below). The dramatic downfield shift observed in the resonance of the OH unit is in line with the formation of the **4·OEt<sub>2</sub>** adduct.

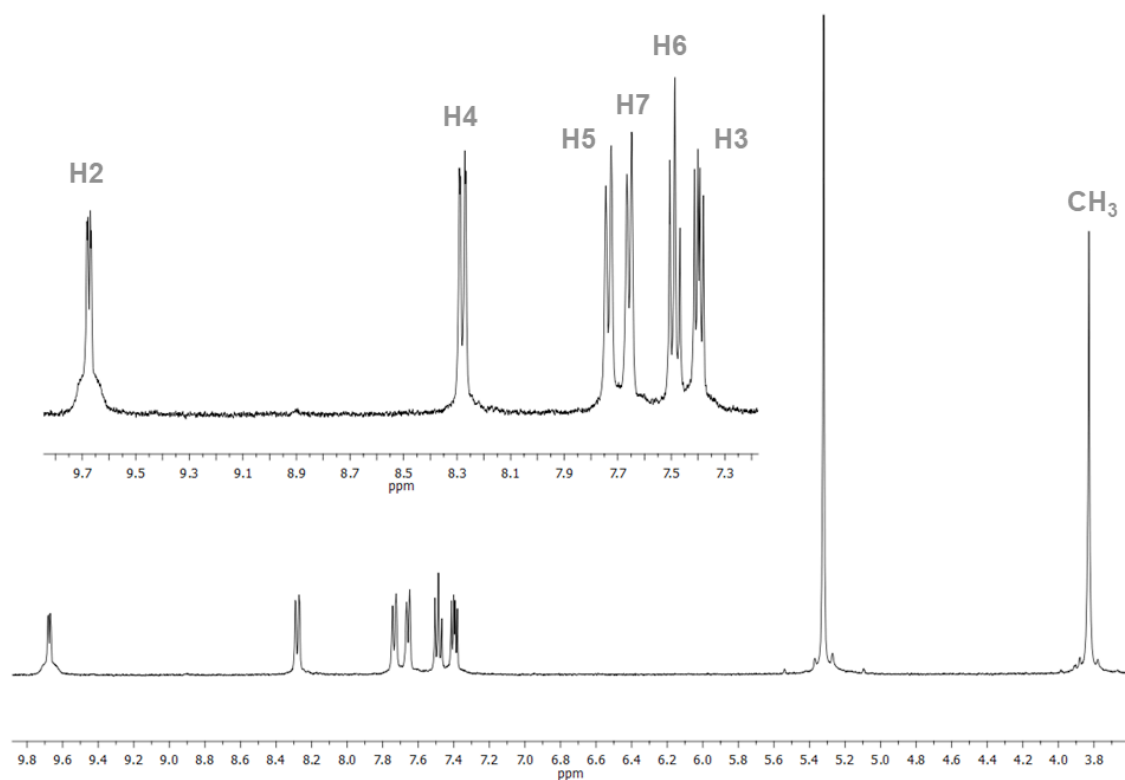

**Figure S12.**  $^1\text{H}$  NMR spectrum (400.130 MHz) of  $[\text{NBu}_4][(\text{CF}_3)_3\text{Pt}(\text{mq})]$  (**5**) in  $\text{CD}_2\text{Cl}_2$  solution at 273 K.

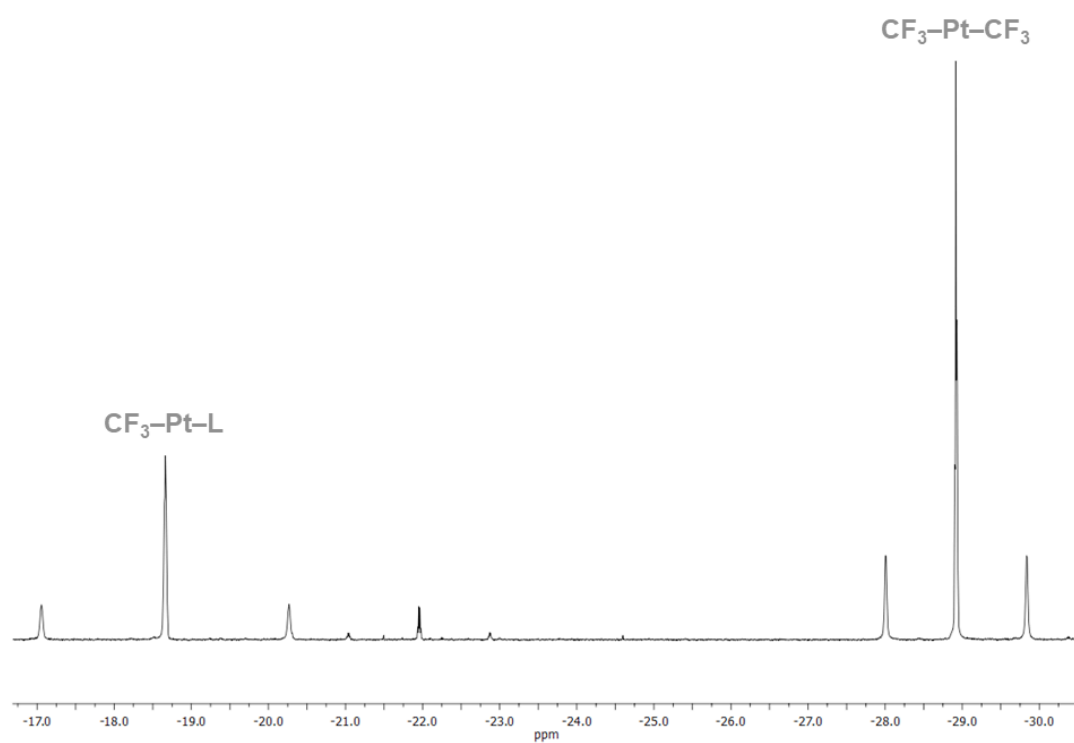

**Figure S13.**  $^{19}\text{F}$  NMR spectrum (282.231 MHz) of  $[\text{NBu}_4][(\text{CF}_3)_3\text{Pt}(\text{mq})]$  (**5**) in  $\text{CD}_2\text{Cl}_2$  solution at 273 K.

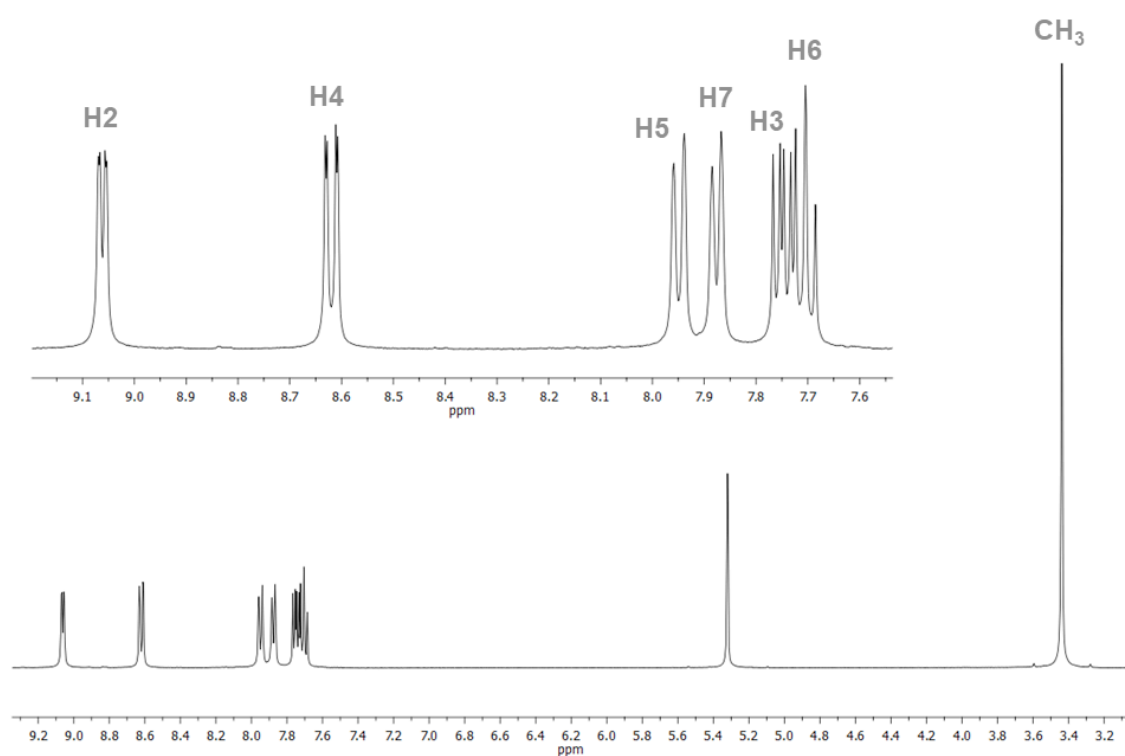

**Figure S14.**  $^1\text{H}$  NMR spectrum (400.130 MHz) of  $(\text{CF}_3)_3\text{Au}(\text{mq})$  (**6**) in  $\text{CD}_2\text{Cl}_2$  solution at 298 K.

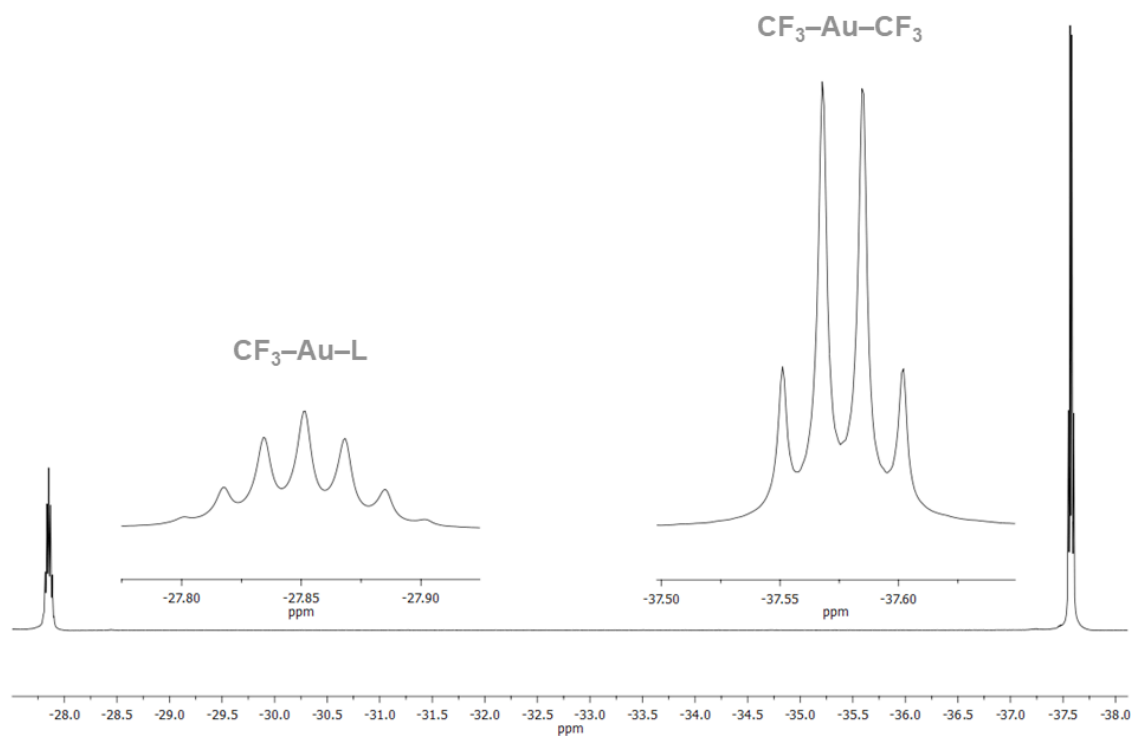

**Figure S15.**  $^{19}\text{F}$  NMR spectrum (376.308 MHz) of  $(\text{CF}_3)_3\text{Au}(\text{mq})$  (**6**) in  $\text{CD}_2\text{Cl}_2$  solution at 298 K.

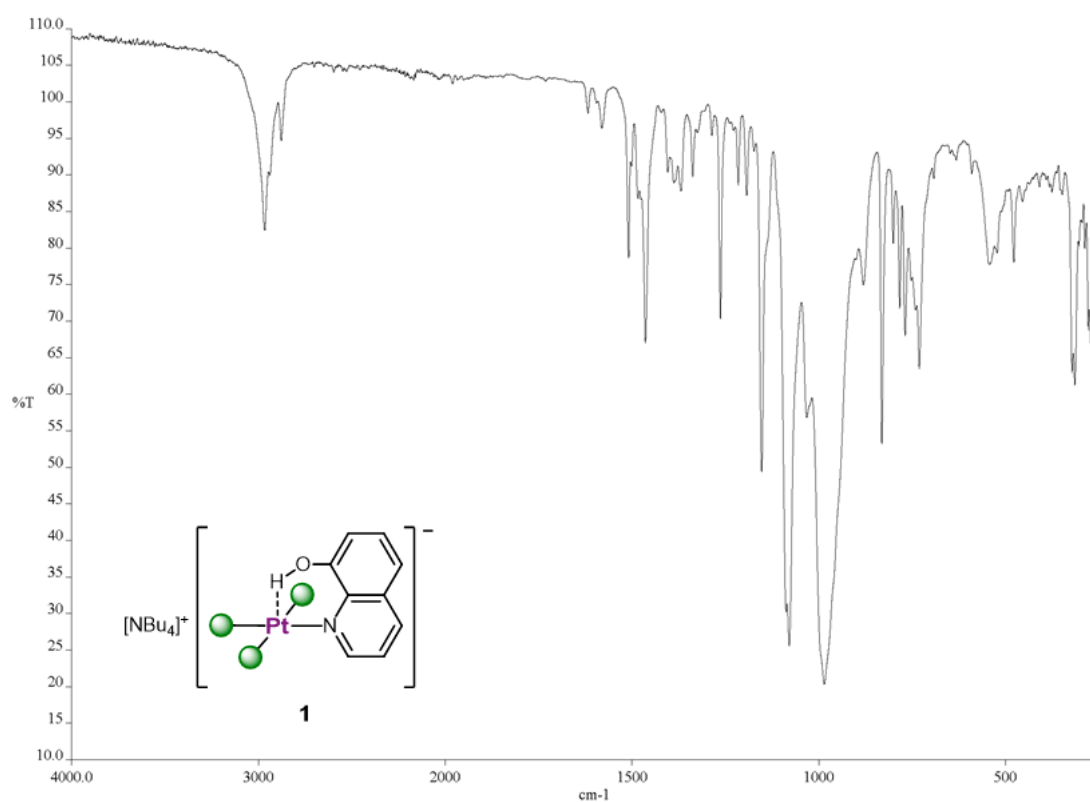

**Figure S16.** IR spectrum of compound **1**. No absorption above 3000  $\text{cm}^{-1}$  is observed.

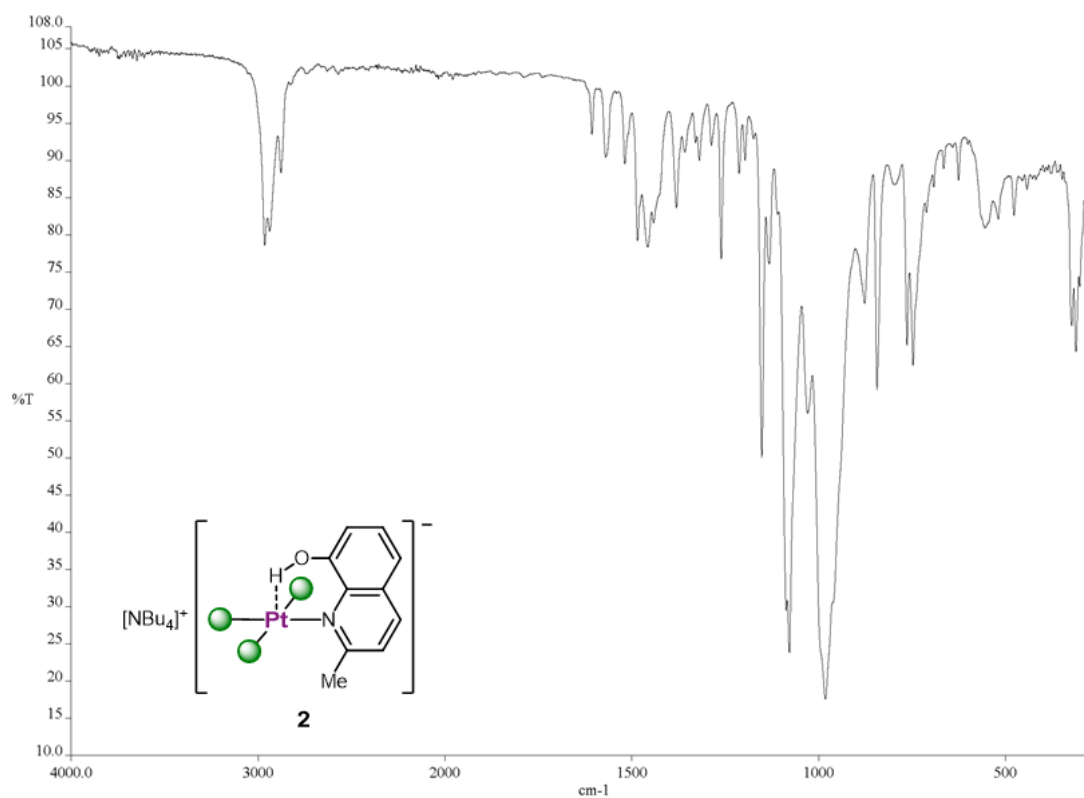

**Figure S17.** IR spectrum of compound **2**. No absorption above 3000  $\text{cm}^{-1}$  is observed.



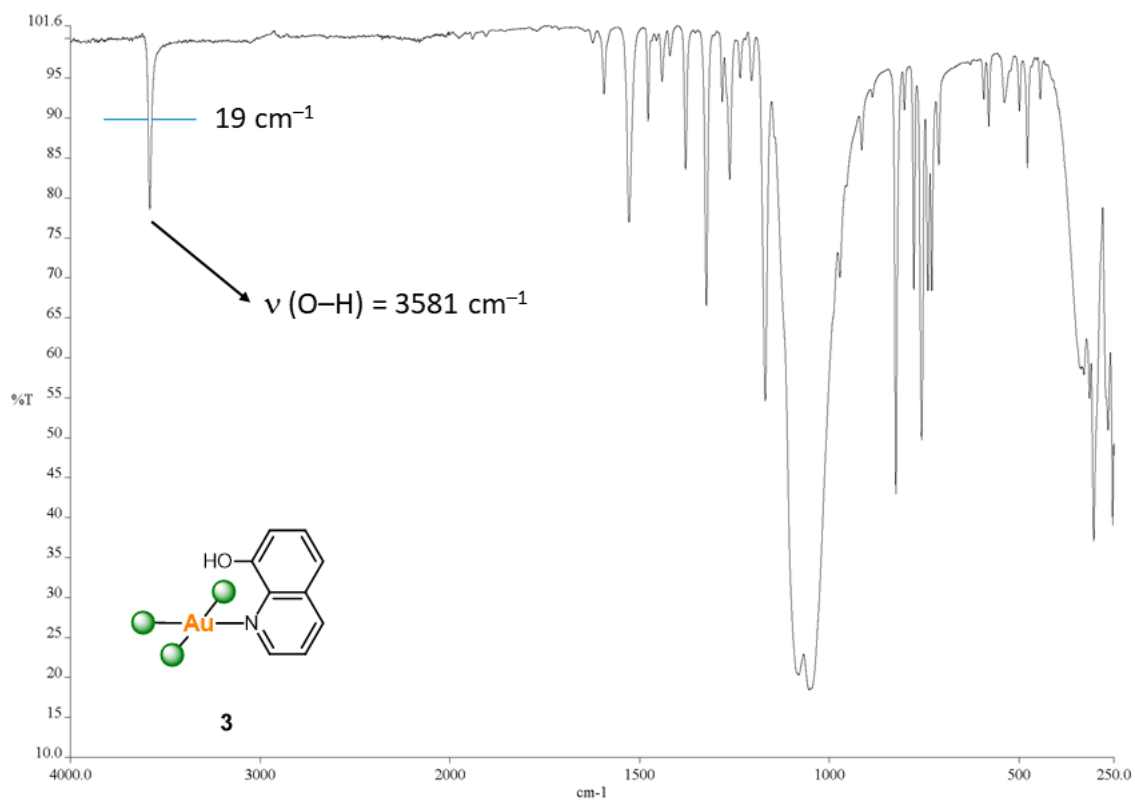

Figure S18. IR spectrum of compound 3.

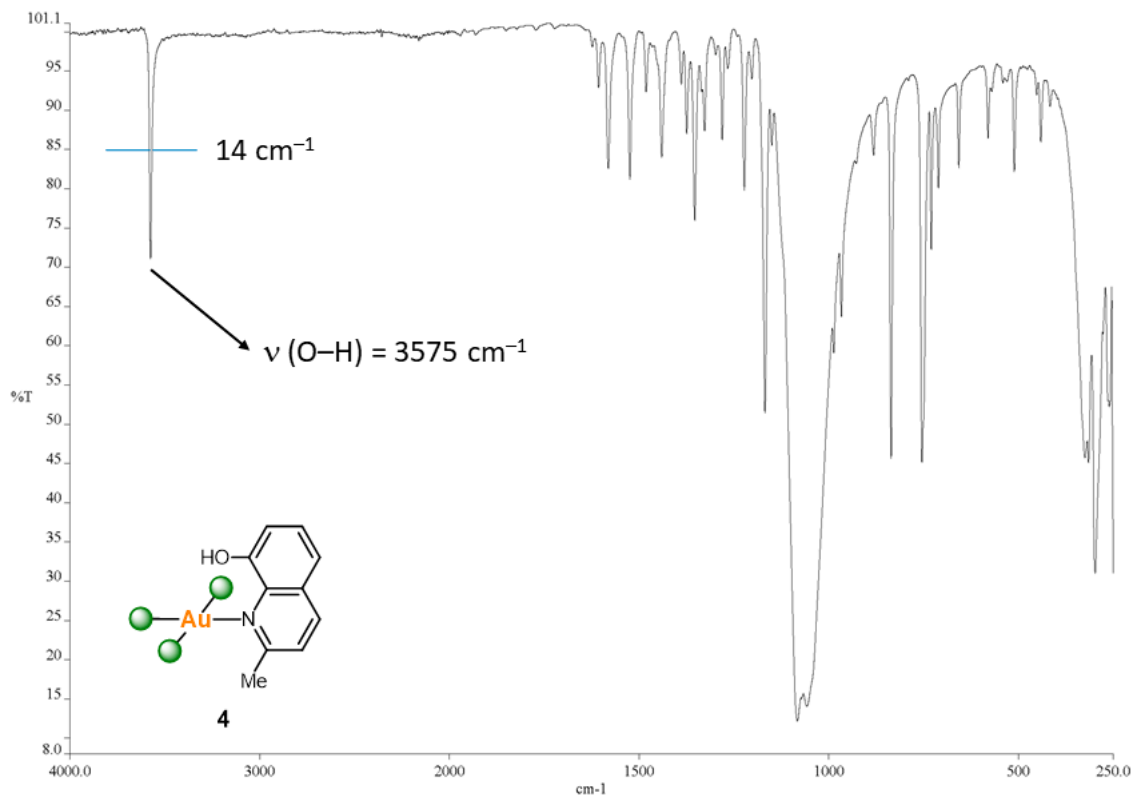

Figure S19. IR spectrum of compound 4.

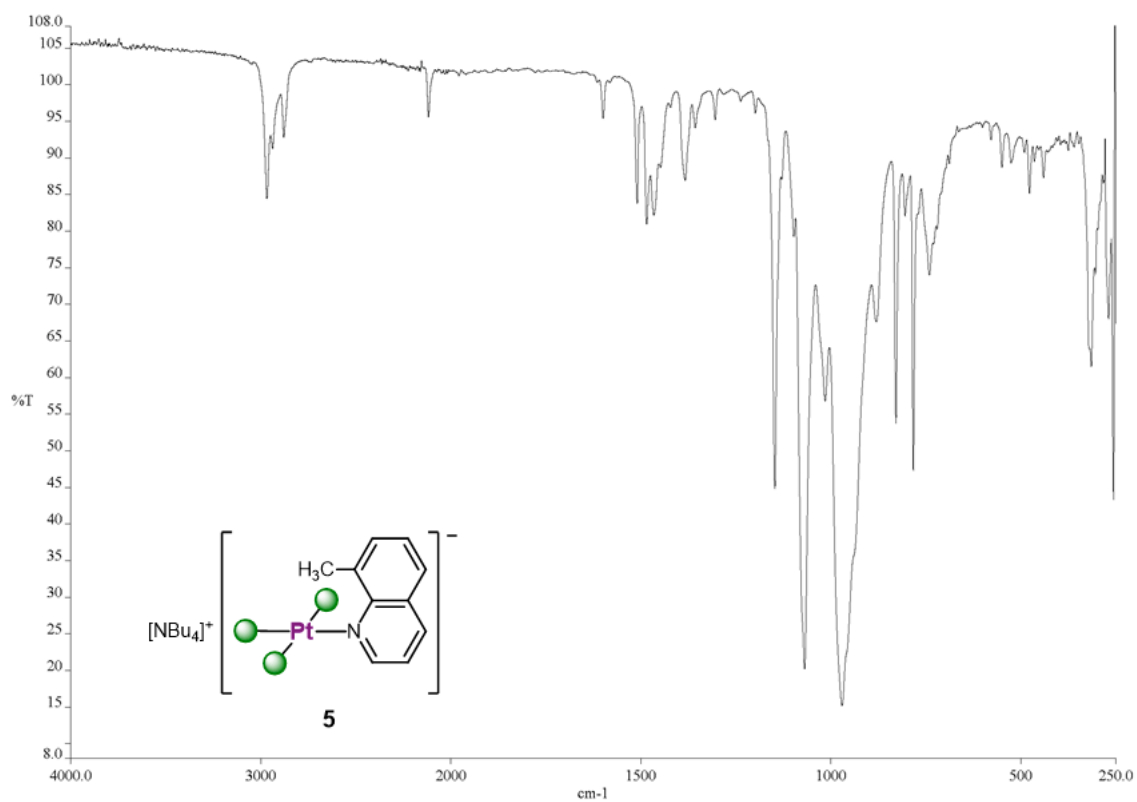

**Figure S20.** IR spectrum of compound **5**.

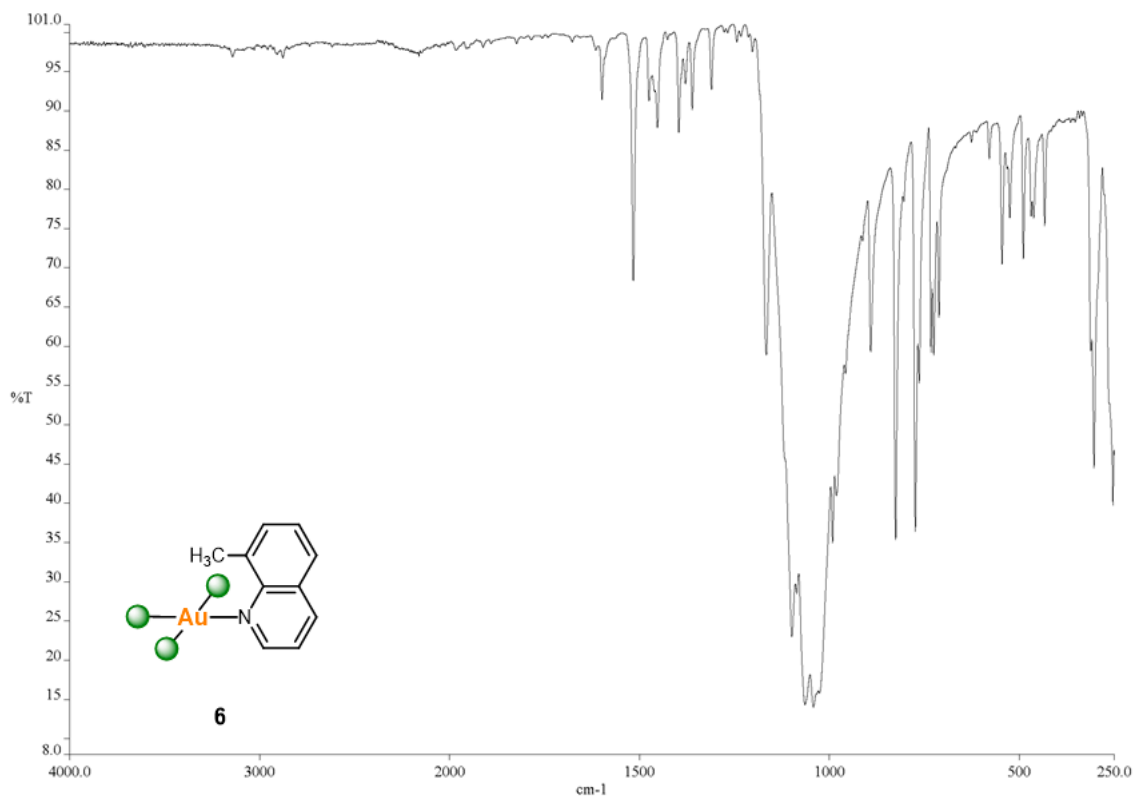

**Figure S21.** IR spectrum of compound **6**.

## 2. Crystal Data and Structure Refinement

Crystal data and other details of the structure analyses are presented in Tables S1–S5. Suitable crystals for X-ray diffraction studies were obtained as indicated in the corresponding experimental entry. Crystals were mounted at the end of a quartz fibre. The radiation used in all cases was graphite monochromated Mo-K $\alpha$  ( $\lambda$  = 71.073 pm). X-ray intensity data were collected on an Oxford Diffraction Xcalibur diffractometer. The diffraction frames were integrated and corrected from absorption by using the CrysAlis RED program.<sup>S5</sup> Data collection was performed at 100 K.

The structures were solved by Patterson and Fourier methods and refined by full-matrix least squares on  $F^2$  with SHELXL.<sup>S6</sup> All non-H atoms were assigned anisotropic displacement parameters and refined without positional constraints. The positions of the H atoms were constrained to idealised geometries and assigned isotropic displacement parameters equal to 1.2 or 1.5 times the  $U_{\text{iso}}$  values of their respective parent atoms, except as noted below. All CH<sub>3</sub> groups were allowed to freely rotate around the C–C bond. In the structures of **2** and **3**·OEt<sub>2</sub>, the position of the OH atom was found in the electron density maps and allowed to refine freely both in position and in thermal parameter. For **3**·OH<sub>2</sub>, the positions of all three OH atoms were found in the electron density maps and later refined with 1.2 times  $U_{\text{iso}}$  values of their parent O atoms at a fixed O–H distance of 82 pm (DFIX). In the structure of **5**, the CF<sub>3</sub> groups show rotational disorder, which was modelled with two sets of F atoms in equally occupied positions. Constrains in the  $U_{\text{iso}}$  values of the F atoms and in the C–F distance were added. Full-matrix least-squares refinement of the models against  $F^2$  converged to final residual indices given in Tables S1–S5.

**Table S1.** Crystal data and structure refinement for compound **2**

|                                               |                                                                   |
|-----------------------------------------------|-------------------------------------------------------------------|
| formula                                       | C <sub>29</sub> H <sub>45</sub> F <sub>9</sub> N <sub>2</sub> OPt |
| $M_r$ [g mol <sup>-1</sup> ]                  | 803.76                                                            |
| $T$ [K]                                       | 100(1)                                                            |
| $\lambda$ [pm]                                | 71.073                                                            |
| crystal system                                | monoclinic                                                        |
| space group                                   | $P2_1$                                                            |
| $a$ [pm]                                      | 806.37(2)                                                         |
| $b$ [pm]                                      | 1657.56(3)                                                        |
| $c$ [pm]                                      | 1215.07(2)                                                        |
| $\beta$ [°]                                   | 103.532(2)                                                        |
| $V$ [nm <sup>3</sup> ]                        | 1.57897(5)                                                        |
| $Z$                                           | 2                                                                 |
| $\rho$ [g cm <sup>-3</sup> ]                  | 1.691                                                             |
| $\mu$ [mm <sup>-1</sup> ]                     | 4.522                                                             |
| $F(000)$                                      | 800                                                               |
| $2\theta$ range [°]                           | 9.1–58.7                                                          |
| no. of reflns colltd                          | 17746                                                             |
| no. of unique reflns                          | 7229                                                              |
| $R_{\text{int}}$                              | 0.0374                                                            |
| $R$ indices [ $I > 2\sigma(I)$ ] <sup>a</sup> |                                                                   |
| $R_1$                                         | 0.0303                                                            |
| $wR_2$                                        | 0.0678                                                            |
| $R$ indices (all data)                        |                                                                   |
| $R_1$                                         | 0.0333                                                            |
| $wR_2$                                        | 0.0710                                                            |
| goodness-of-fit <sup>b</sup> on $F^2$         | 1.025                                                             |
| Abs. struct. param.                           | −0.020(5)                                                         |
| CCDC no.                                      | 2040138                                                           |

<sup>a</sup>  $R_1 = \sum(|F_o| - |F_c|) / \sum|F_o|$ ;  $wR_2 = [\sum w(F_o^2 - F_c^2)^2 / \sum w(F_o^2)^2]^{1/2}$ .

<sup>b</sup> Goodness-of-fit =  $[\sum w(F_o^2 - F_c^2)^2 / (n_{\text{obs}} - n_{\text{param}})]^{1/2}$ .

**Table S2.** Crystal data and structure refinement for compound **3**·OEt<sub>2</sub>

|                                               |                                                                     |
|-----------------------------------------------|---------------------------------------------------------------------|
| formula                                       | C <sub>12</sub> H <sub>7</sub> AuF <sub>9</sub> NO·OEt <sub>2</sub> |
| $M_t$ [g mol <sup>-1</sup> ]                  | 623.27                                                              |
| $T$ [K]                                       | 100(1)                                                              |
| $\lambda$ [pm]                                | 71.073                                                              |
| crystal system                                | monoclinic                                                          |
| space group                                   | $P2_1/c$                                                            |
| $a$ [pm]                                      | 1360.93(5)                                                          |
| $b$ [pm]                                      | 1029.74(3)                                                          |
| $c$ [pm]                                      | 1436.95(4)                                                          |
| $\beta$ [°]                                   | 98.813(3)                                                           |
| $V$ [nm <sup>3</sup> ]                        | 1.98998(11)                                                         |
| $Z$                                           | 4                                                                   |
| $\rho$ [g cm <sup>-3</sup> ]                  | 2.080                                                               |
| $\mu$ [mm <sup>-1</sup> ]                     | 7.486                                                               |
| $F(000)$                                      | 1184                                                                |
| $2\theta$ range [°]                           | 8.4–59.5                                                            |
| no. of reflns colltd                          | 19835                                                               |
| no. of unique reflns                          | 5175                                                                |
| $R_{\text{int}}$                              | 0.0412                                                              |
| $R$ indices [ $I > 2\sigma(I)$ ] <sup>a</sup> |                                                                     |
| $R_1$                                         | 0.0285                                                              |
| $wR_2$                                        | 0.0575                                                              |
| $R$ indices (all data)                        |                                                                     |
| $R_1$                                         | 0.0373                                                              |
| $wR_2$                                        | 0.0620                                                              |
| goodness-of-fit <sup>b</sup> on $F^2$         | 1.045                                                               |
| CCDC no.                                      | 2040139                                                             |

<sup>a</sup>  $R_1 = \sum(|F_o| - |F_c|) / \sum|F_o|$ ;  $wR_2 = [\sum w(F_o^2 - F_c^2)^2 / \sum w(F_o^2)^2]^{1/2}$ .

<sup>b</sup> Goodness-of-fit =  $[\sum w(F_o^2 - F_c^2)^2 / (n_{\text{obs}} - n_{\text{param}})]^{1/2}$ .

**Table S3.** Crystal data and structure refinement for compound **3**·OH<sub>2</sub>

|                                               |                                                                    |
|-----------------------------------------------|--------------------------------------------------------------------|
| formula                                       | C <sub>12</sub> H <sub>7</sub> AuF <sub>9</sub> NO·OH <sub>2</sub> |
| $M_r$ [g mol <sup>-1</sup> ]                  | 567.17                                                             |
| $T$ [K]                                       | 100(1)                                                             |
| $\lambda$ [pm]                                | 71.073                                                             |
| crystal system                                | triclinic                                                          |
| space group                                   | $P\bar{1}$                                                         |
| $a$ [pm]                                      | 805.27 (1)                                                         |
| $b$ [pm]                                      | 948.58(2)                                                          |
| $c$ [pm]                                      | 1040.80(2)                                                         |
| $\alpha$ [°]                                  | 95.525(2)                                                          |
| $\beta$ [°]                                   | 98.451(1)                                                          |
| $\gamma$ [°]                                  | 100.077(2)                                                         |
| $V$ [nm <sup>3</sup> ]                        | 0.76816(2)                                                         |
| $Z$                                           | 2                                                                  |
| $\rho$ [g cm <sup>-3</sup> ]                  | 2.452                                                              |
| $\mu$ [mm <sup>-1</sup> ]                     | 9.683                                                              |
| $F(000)$                                      | 528                                                                |
| $2\theta$ range [°]                           | 6.0–56.8                                                           |
| no. of reflns colltd                          | 29617                                                              |
| no. of unique reflns                          | 3519                                                               |
| $R_{\text{int}}$                              | 0.0404                                                             |
| $R$ indices [ $I > 2\sigma(I)$ ] <sup>a</sup> |                                                                    |
| $R_1$                                         | 0.0186                                                             |
| $wR_2$                                        | 0.0431                                                             |
| $R$ indices (all data)                        |                                                                    |
| $R_1$                                         | 0.0192                                                             |
| $wR_2$                                        | 0.0434                                                             |
| goodness-of-fit <sup>b</sup> on $F^2$         | 1.156                                                              |
| CCDC no.                                      | 2040140                                                            |

<sup>a</sup>  $R_1 = \sum(|F_o| - |F_c|) / \sum|F_o|$ ;  $wR_2 = [\sum w(F_o^2 - F_c^2)^2 / \sum w(F_o^2)^2]^{1/2}$ .<sup>b</sup> Goodness-of-fit =  $[\sum w(F_o^2 - F_c^2)^2 / (n_{\text{obs}} - n_{\text{param}})]^{1/2}$ .

**Table S4.** Crystal data and structure refinement for compound **5**

|                                               |                                                                  |
|-----------------------------------------------|------------------------------------------------------------------|
| formula                                       | C <sub>29</sub> H <sub>45</sub> F <sub>9</sub> N <sub>2</sub> Pt |
| $M_r$ [g mol <sup>-1</sup> ]                  | 787.76                                                           |
| $T$ [K]                                       | 100(1)                                                           |
| $\lambda$ [pm]                                | 71.073                                                           |
| crystal system                                | monoclinic                                                       |
| space group                                   | $P2_1/c$                                                         |
| $a$ [pm]                                      | 1094.40(2)                                                       |
| $b$ [pm]                                      | 1761.47(4)                                                       |
| $c$ [pm]                                      | 1657.47(3)                                                       |
| $\beta$ [°]                                   | 101.576(2)                                                       |
| $V$ [nm <sup>3</sup> ]                        | 3.13020(10)                                                      |
| $Z$                                           | 4                                                                |
| $\rho$ [g cm <sup>-3</sup> ]                  | 1.672                                                            |
| $\mu$ [mm <sup>-1</sup> ]                     | 4.557                                                            |
| $F(000)$                                      | 1568                                                             |
| $2\theta$ range [°]                           | 8.8–58.6                                                         |
| no. of reflns colltd                          | 34391                                                            |
| no. of unique reflns                          | 7661                                                             |
| $R_{\text{int}}$                              | 0.0393                                                           |
| $R$ indices [ $I > 2\sigma(I)$ ] <sup>a</sup> |                                                                  |
| $R_1$                                         | 0.0654                                                           |
| $wR_2$                                        | 0.1634                                                           |
| $R$ indices (all data)                        |                                                                  |
| $R_1$                                         | 0.0746                                                           |
| $wR_2$                                        | 0.1697                                                           |
| goodness-of-fit <sup>b</sup> on $F^2$         | 1.070                                                            |
| CCDC no.                                      | 2040141                                                          |

<sup>a</sup>  $R_1 = \sum(|F_o| - |F_c|) / \sum|F_o|$ ;  $wR_2 = [\sum w(F_o^2 - F_c^2)^2 / \sum w(F_o^2)^2]^{1/2}$ .

<sup>b</sup> Goodness-of-fit =  $[\sum w(F_o^2 - F_c^2)^2 / (n_{\text{obs}} - n_{\text{param}})]^{1/2}$ .

**Table S5.** Crystal data and structure refinement for compound **6**

|                                               |                                                   |
|-----------------------------------------------|---------------------------------------------------|
| formula                                       | C <sub>13</sub> H <sub>9</sub> AuF <sub>9</sub> N |
| $M_r$ [g mol <sup>-1</sup> ]                  | 547.18                                            |
| $T$ [K]                                       | 100(1)                                            |
| $\lambda$ [pm]                                | 71.073                                            |
| crystal system                                | monoclinic                                        |
| space group                                   | $P2_1/c$                                          |
| $a$ [pm]                                      | 1152.07(2)                                        |
| $b$ [pm]                                      | 1538.69(2)                                        |
| $c$ [pm]                                      | 823.76(2)                                         |
| $\beta$ [°]                                   | 96.571(1)                                         |
| $V$ [nm <sup>3</sup> ]                        | 1.45067(4)                                        |
| $Z$                                           | 4                                                 |
| $\rho$ [g cm <sup>-3</sup> ]                  | 2.505                                             |
| $\mu$ [mm <sup>-1</sup> ]                     | 10.240                                            |
| $F(000)$                                      | 1016                                              |
| $2\theta$ range [°]                           | 4.8–56.9                                          |
| no. of reflns colltd                          | 27537                                             |
| no. of unique reflns                          | 3341                                              |
| $R_{\text{int}}$                              | 0.0341                                            |
| $R$ indices [ $I > 2\sigma(I)$ ] <sup>a</sup> |                                                   |
| $R_1$                                         | 0.0204                                            |
| $wR_2$                                        | 0.0403                                            |
| $R$ indices (all data)                        |                                                   |
| $R_1$                                         | 0.0235                                            |
| $wR_2$                                        | 0.0413                                            |
| goodness-of-fit <sup>b</sup> on $F^2$         | 1.123                                             |
| CCDC no.                                      | 2040142                                           |

<sup>a</sup>  $R_1 = \sum(|F_o| - |F_c|) / \sum|F_o|$ ;  $wR_2 = [\sum w(F_o^2 - F_c^2)^2 / \sum w(F_o^2)^2]^{1/2}$ .

<sup>b</sup> Goodness-of-fit =  $[\sum w(F_o^2 - F_c^2)^2 / (n_{\text{obs}} - n_{\text{param}})]^{1/2}$ .



### 3. Computational Details

Quantum mechanical calculations were performed with the Gaussian09 package<sup>S7</sup> at the DFT/M06 level of theory.<sup>S8</sup> Non-metal atoms (H, C, N, O and F) were described with a 6-31G\*\* basis set.<sup>S9,S10</sup> In turn, the SDD basis set and its corresponding effective core potentials (ECPs) were used to describe the metal atoms (Pt and Au)<sup>S11</sup> augmented by additional sets of f-type functions.<sup>S12</sup> The potential energy surfaces of the complexes under study have been examined at this level of theory and their geometries have been optimized in the gas phase with no symmetry restrictions, except as noted below. Frequency calculations have been performed for every stationary point in order to identify them as minima or transition states. Relevant experimental and calculated geometric parameters are compared in Table S6. The model complexes **7** and **8** have virtual  $C_s$  symmetry when freely optimized. In order to ease the analysis of their electronic structures, the geometries were re-optimized under imposed  $C_s$  symmetry. The resulting geometries **7- $C_s$**  and **8- $C_s$**  (Figure 6) lay very close in energy to the former ones ( $\Delta E < 1 \text{ kcal mol}^{-1}$ ). Atomic coordinates for all the optimized structures are included as a separate .xyz file.

Topological analyses of the electron density distribution functions  $\rho(\mathbf{r})$  were performed for compounds **1–4** as well as for the adduct **3·OEt<sub>2</sub>** using the AIMAll program package<sup>S13</sup> based on the extended wave functions obtained by M06 calculations. The AIM extended wave-function format allows QTAIM analyses of molecular systems containing heavy atoms described with ECPs. The topological features of especially relevant critical points (CP) are given in Table 2. Important cross sections in the contour-line  $\nabla^2\rho(\mathbf{r})$  maps are shown in Figures 5 (**1–4**) and S22 (**3·OEt<sub>2</sub>**). The electronic structures and MO compositions of **7- $C_s$**  and **8- $C_s$**  were analyzed (Figure 7) by using Chemissian software.<sup>S14</sup>

**Table S6.** Comparison of the most relevant geometric parameters of the structurally characterized derivatives containing the isoelectronic (CF<sub>3</sub>)<sub>3</sub>M fragments in this work (M = Pt, Au; E = C, O) with those calculated at the DFT/M06 level of theory.<sup>a</sup>

| Compound                                                                                | M–C<br>(pm) <sup>b</sup> | av- M–C <sub>2</sub><br>(pm) <sup>c</sup> | M–N<br>(pm) | M···E<br>(pm) | E–H<br>(pm)     | M···H<br>(pm)      | ∑∠<br>(deg) <sup>d</sup> |
|-----------------------------------------------------------------------------------------|--------------------------|-------------------------------------------|-------------|---------------|-----------------|--------------------|--------------------------|
| [NBu <sub>4</sub> ][(CF <sub>3</sub> ) <sub>3</sub> Pt(hq')] ( <b>2</b> )               | 202.0(6)                 | 206.6(7)                                  | 213.2(5)    | 297.2(5)      | 97(9)           | 205(9)             | 360.1(3)                 |
| <b>2</b> -DFT                                                                           | 200.5                    | 208.5                                     | 220.5       | 300.5         | 99.5            | 205.5              | 360                      |
| (CF <sub>3</sub> ) <sub>3</sub> Au(hq·OEt <sub>2</sub> ) ( <b>3</b> ·OEt <sub>2</sub> ) | 202.3(4)                 | 207.6(4)                                  | 210.9(3)    | 268.8(3)      | 77(5)           | — <sup>e</sup>     | 360.02(16)               |
| <b>3</b> ·OEt <sub>2</sub> -DFT                                                         | 204.5                    | 210.5                                     | 219         | 264           | 99.5            | — <sup>e</sup>     | 360                      |
| [NBu <sub>4</sub> ][(CF <sub>3</sub> ) <sub>3</sub> Pt(mq)] ( <b>5</b> )                | 199.9(8)                 | 205.7(8)                                  | 212.7(7)    | 309(1)        | 98 <sup>f</sup> | 273 <sup>f,g</sup> | 360.3(3)                 |
| <b>5</b> -DFT                                                                           | 200                      | 208.5                                     | 221.5       | 315           | 109.5           | 273 <sup>g</sup>   | 360                      |
| (CF <sub>3</sub> ) <sub>3</sub> Au(mq) ( <b>6</b> )                                     | 202.9(3)                 | 208.9(3)                                  | 211.2(3)    | 305.1(3)      | 98 <sup>f</sup> | 267 <sup>f,g</sup> | 360.04(13)               |
| <b>6</b> -DFT                                                                           | 205                      | 211                                       | 219         | 306           | 109.5           | 270 <sup>g</sup>   | 360                      |

<sup>a</sup> Atomic coordinates of the optimized structures are given in a separate .xyz file. <sup>b</sup> The M–C distance *trans* to the neutral N-donor ligand is here indicated. <sup>c</sup> Average of the two independent M–C bond lengths in *trans* arrangement. <sup>d</sup> Summation of all adjacent E–M–E' angles as a measure of planarity. <sup>e</sup> The O–H unit interacts with a Et<sub>2</sub>O molecule, where the Et<sub>2</sub>O···H–O angle amounts 178(6)° (exp.) vs. 159° (theor.), and the O···O' separation is 263.6(4) pm (exp.) vs. 258 pm (theor.). <sup>f</sup> No estimated experimental error is here indicated because the H position was refined under constraints. <sup>g</sup> The closest M···H distance is here indicated.

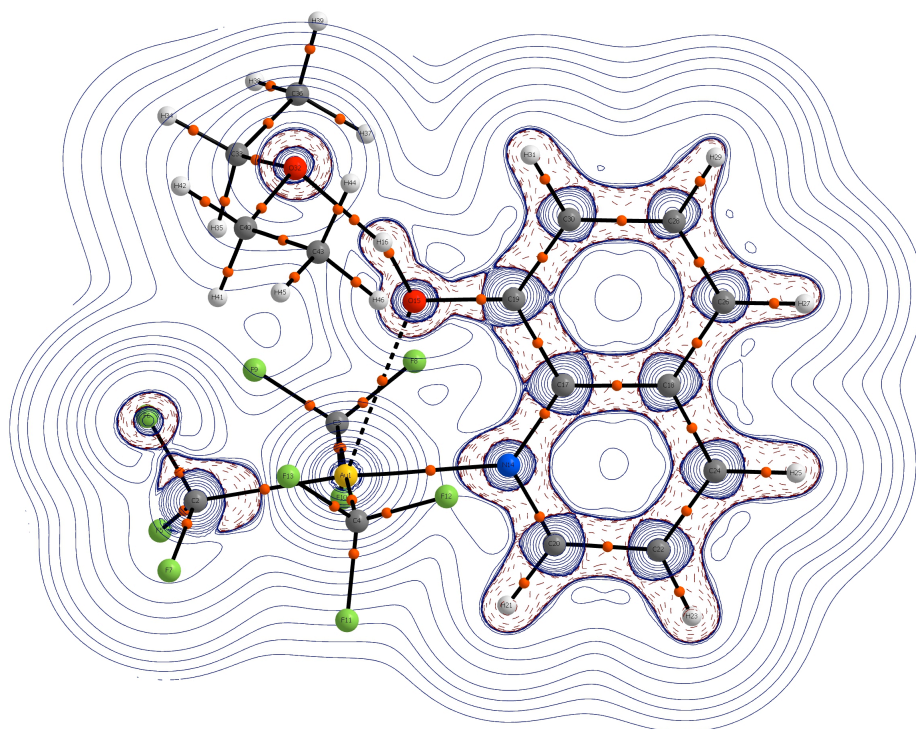

**Figure S22.** 2D contour-line  $\nabla^2\rho(\mathbf{r})$  diagram obtained from QTAIM analysis of the optimized **3**·OEt<sub>2</sub> adduct. The cross section contains the Au, O and N atoms. Bond critical points (orange spheres) and bond paths (black straight lines) are shown as obtained using weak-CP (0.03) and non-CP (0.02) thresholds.

#### 4. Notes and References

- S1 S. Martínez-Salvador, J. Forniés, A. Martín, B. Menjón and I. Usón, *Chem. Eur. J.*, 2013, **19**, 324.
- S2 A. Pérez-Bitrián, M. Baya, J. M. Casas, L. R. Falvello, A. Martín and B. Menjón, *Chem. Eur. J.*, 2017, **23**, 14918.
- S3 The quaternary carbon atoms C8, C9 and C10 could not be located.
- S4 The quaternary carbon atoms C8 and C10 could not be located.
- S5 CrysAlis RED: *Program for X-ray CCD camera data reduction*, Oxford Diffraction Ltd., Oxford, UK, 2008.
- S6 SHELXL Version 2014/8: G. M. Sheldrick, *Acta Crystallogr. Sect. C*, 2015, **71**, 3.
- S7 M. J. Frisch, G. W. Trucks, H. B. Schlegel, G. E. Scuseria, M. A. Robb, J. R. Cheeseman, G. Scalmani, V. Barone, B. Mennucci, G. A. Petersson, H. Nakatsuji, M. Caricato, X. Li, H. P. Hratchian, A. F. Izmaylov, J. Bloino, G. Zheng, J. L. Sonnenberg, M. Hada, M. Ehara, K. Toyota, R. Fukuda, J. Hasegawa, M. Ishida, T. Nakajima, Y. Honda, O. Kitao, H. Nakai, T. Vreven, J. A. Montgomery, Jr., J. E. Peralta, F. Ogliaro, M. Bearpark, J. J. Heyd, E. Brothers, K. N. Kudin, V. N. Staroverov, T. Keith, R. Kobayashi, J. Normand, K. Raghavachari, A. Rendell, J. C. Burant, S. S. Iyengar, J. Tomasi, M. Cossi, N. Rega, J. M. Millam, M. Klene, J. E. Knox, J. B. Cross, V. Bakken, C. Adamo, J. Jaramillo, R. Gomperts, R. E. Stratmann, O. Yazyev, A. J. Austin, R. Cammi, C. Pomelli, J. W. Ochterski, R. L. Martin, K. Morokuma, V. G. Zakrzewski, G. A. Voth, P. Salvador, J. J. Dannenberg, S. Dapprich, A. D. Daniels, O. Farkas, J. B. Foresman, J. V. Ortiz, J. Cioslowski and D. J. Fox: *Gaussian 09, Revision D.01*; Gaussian, Inc., Wallingford CT, 2013.
- S8 Y. Zhao and D. G. Truhlar, *Theor. Chem. Acc.*, 2008, **120**, 215.

- S9 P. C. Hariharan and J. A. Pople, *Theor. Chim. Acta*, 1973, **28**, 213.
- S10 M. M. Francel, W. J. Pietro, W. J. Hehre, J. S. Binkley, M. S. Gordon, D. J. DeFrees and J. A. Pople, *J. Chem. Phys.*, 1982, **77**, 3654.
- S11 D. Andrae, U. Häußermann, M. Dolg, H. Stoll and H. Preuß, *Theor. Chim. Acta*, 1990, **77**, 123.
- S12 A. W. Ehlers, M. Böhme, S. Dapprich, A. Gobbi, A. Höllwarth, V. Jonas, K. F. Köhler, R. Stegmann, A. Veldkamp and G. Frenking, *Chem. Phys. Lett.*, 1993, **208**, 111.
- S13 A. Todd and T. K. Keith: AIMAll, version 13.05.06; Gristmill Software, Overland Park KS, 2013.
- S14 L. V. Skripnikov: Chemissian, Version 3.3, *Visualization computer program*, 2012, [www.chemissian.com](http://www.chemissian.com)
